# Supplementary material for: The effect of ad hominem attacks on the evaluation of claims promoted by scientists
Source: PubMed Central journal article supplement (PMC5790247; doi:10.1371/journal.pone.0192025), 2018-01-30
Supplement: pone.0192025.s002.pdf [file pone.0192025.s002.pdf]

**S2 Table.** Summary of sequence of items within each questionnaire.\*

## Questionnaire #1

| Item# | Item type    | Attack (if present)  |
|-------|--------------|----------------------|
| 1     | Claim11      |                      |
| 2     | Distractor1  |                      |
| 3     | Distractor2  |                      |
| 4     | Distractor3  |                      |
| 5     | Claim5       |                      |
| 6     | Claim6       | Education            |
| 7     | Claim8       | Conflict of interest |
| 8     | Distractor4  |                      |
| 9     | Distractor5  |                      |
| 10    | Distractor6  |                      |
| 11    | Claim3       |                      |
| 12    | Distractor7  |                      |
| 13    | Claim10      | Sloppy               |
| 14    | Distractor8  |                      |
| 15    | Claim9       |                      |
| 16    | Distractor9  |                      |
| 17    | Distractor10 |                      |
| 18    | Claim12      | Empirical            |
| 19    | Claim4       | Past misconduct      |
| 20    | Distractor11 |                      |
| 21    | Claim7       |                      |
| 22    | Distractor12 |                      |
| 23    | Claim1       |                      |
| 24    | Claim2       | Relevant misconduct  |

\*Each questionnaire contained 24 items. Twelve items were distractors, 12 were critical items. Critical items could be science claims in isolation or science claims followed by one of the six types of attack (e.g. empirical, relevant misconduct, etc.).

Questionnaire #2

| Item# | Item type    | Attack (if present)  |
|-------|--------------|----------------------|
| 1     | Claim11      | Empirical            |
| 2     | Distractor1  |                      |
| 3     | Distractor2  |                      |
| 4     | Distractor3  |                      |
| 5     | Claim5       |                      |
| 6     | Claim6       | Relevant misconduct  |
| 7     | Claim8       |                      |
| 8     | Distractor4  |                      |
| 9     | Distractor5  |                      |
| 10    | Distractor6  |                      |
| 11    | Claim3       | Past misconduct      |
| 12    | Distractor7  |                      |
| 13    | Claim10      |                      |
| 14    | Distractor8  |                      |
| 15    | Claim9       | Education            |
| 16    | Distractor9  |                      |
| 17    | Distractor10 |                      |
| 18    | Claim12      |                      |
| 19    | Claim4       | Conflict of interest |
| 20    | Distractor11 |                      |
| 21    | Claim7       |                      |
| 22    | Distractor12 |                      |
| 23    | Claim1       | Sloppy               |
| 24    | Claim2       |                      |

Questionnaire #3

| Item# | Item type    | Attack (if present)  |
|-------|--------------|----------------------|
| 1     | Claim11      |                      |
| 2     | Distractor1  |                      |
| 3     | Distractor2  |                      |
| 4     | Distractor3  |                      |
| 5     | Claim5       |                      |
| 6     | Claim6       | Conflict of interest |
| 7     | Claim8       | Education            |
| 8     | Distractor4  |                      |
| 9     | Distractor5  |                      |
| 10    | Distractor6  |                      |
| 11    | Claim3       |                      |
| 12    | Distractor7  |                      |
| 13    | Claim10      | Relevant misconduct  |
| 14    | Distractor8  |                      |
| 15    | Claim9       |                      |
| 16    | Distractor9  |                      |
| 17    | Distractor10 |                      |
| 18    | Claim12      | Past misconduct      |
| 19    | Claim4       | Empirical            |
| 20    | Distractor11 |                      |
| 21    | Claim7       |                      |
| 22    | Distractor12 |                      |
| 23    | Claim1       |                      |
| 24    | Claim2       | Sloppy               |

Questionnaire #4

| Item# | Item type    | Attack (if present)  |
|-------|--------------|----------------------|
| 1     | Claim11      | Relevant misconduct  |
| 2     | Distractor1  |                      |
| 3     | Distractor2  |                      |
| 4     | Distractor3  |                      |
| 5     | Claim5       | Empirical            |
| 6     | Claim6       |                      |
| 7     | Claim8       |                      |
| 8     | Distractor4  |                      |
| 9     | Distractor5  |                      |
| 10    | Distractor6  |                      |
| 11    | Claim3       | Sloppy               |
| 12    | Distractor7  |                      |
| 13    | Claim10      |                      |
| 14    | Distractor8  |                      |
| 15    | Claim9       | Education            |
| 16    | Distractor9  |                      |
| 17    | Distractor10 |                      |
| 18    | Claim12      |                      |
| 19    | Claim4       |                      |
| 20    | Distractor11 |                      |
| 21    | Claim7       | Conflict of interest |
| 22    | Distractor12 |                      |
| 23    | Claim1       | Past misconduct      |
| 24    | Claim2       |                      |

Questionnaire #5

| Item# | Item type    | Attack (if present)  |
|-------|--------------|----------------------|
| 1     | Claim11      |                      |
| 2     | Distractor1  |                      |
| 3     | Distractor2  |                      |
| 4     | Distractor3  |                      |
| 5     | Claim5       |                      |
| 6     | Claim6       | Sloppy               |
| 7     | Claim8       | Relevant misconduct  |
| 8     | Distractor4  |                      |
| 9     | Distractor5  |                      |
| 10    | Distractor6  |                      |
| 11    | Claim3       |                      |
| 12    | Distractor7  |                      |
| 13    | Claim10      | Empirical            |
| 14    | Distractor8  |                      |
| 15    | Claim9       |                      |
| 16    | Distractor9  |                      |
| 17    | Distractor10 |                      |
| 18    | Claim12      | Education            |
| 19    | Claim4       | Conflict of interest |
| 20    | Distractor11 |                      |
| 21    | Claim7       |                      |
| 22    | Distractor12 |                      |
| 23    | Claim1       |                      |
| 24    | Claim2       | Past misconduct      |

Questionnaire #6

| Item# | Item type    | Attack (if present)  |
|-------|--------------|----------------------|
| 1     | Claim11      | Empirical            |
| 2     | Distractor1  |                      |
| 3     | Distractor2  |                      |
| 4     | Distractor3  |                      |
| 5     | Claim5       | Conflict of interest |
| 6     | Claim6       |                      |
| 7     | Claim8       |                      |
| 8     | Distractor4  |                      |
| 9     | Distractor5  |                      |
| 10    | Distractor6  |                      |
| 11    | Claim3       | Past misconduct      |
| 12    | Distractor7  |                      |
| 13    | Claim10      |                      |
| 14    | Distractor8  |                      |
| 15    | Claim9       | Relevant misconduct  |
| 16    | Distractor9  |                      |
| 17    | Distractor10 |                      |
| 18    | Claim12      |                      |
| 19    | Claim4       |                      |
| 20    | Distractor11 |                      |
| 21    | Claim7       | Sloppy               |
| 22    | Distractor12 |                      |
| 23    | Claim1       | Education            |
| 24    | Claim2       |                      |

Questionnaire #7

| Item# | Item type    | Attack (if present)  |
|-------|--------------|----------------------|
| 1     | Claim11      |                      |
| 2     | Distractor1  |                      |
| 3     | Distractor2  |                      |
| 4     | Distractor3  |                      |
| 5     | Claim5       |                      |
| 6     | Claim6       | Relevant misconduct  |
| 7     | Claim8       | Sloppy               |
| 8     | Distractor4  |                      |
| 9     | Distractor5  |                      |
| 10    | Distractor6  |                      |
| 11    | Claim3       |                      |
| 12    | Distractor7  |                      |
| 13    | Claim10      | Past misconduct      |
| 14    | Distractor8  |                      |
| 15    | Claim9       |                      |
| 16    | Distractor9  |                      |
| 17    | Distractor10 |                      |
| 18    | Claim12      | Conflict of interest |
| 19    | Claim4       | Education            |
| 20    | Distractor11 |                      |
| 21    | Claim7       |                      |
| 22    | Distractor12 |                      |
| 23    | Claim1       |                      |
| 24    | Claim2       | Empirical            |

Questionnaire #8

| Item# | Item type    | Attack (if present)  |
|-------|--------------|----------------------|
| 1     | Claim11      | Past misconduct      |
| 2     | Distractor1  |                      |
| 3     | Distractor2  |                      |
| 4     | Distractor3  |                      |
| 5     | Claim5       | Education            |
| 6     | Claim6       |                      |
| 7     | Claim8       |                      |
| 8     | Distractor4  |                      |
| 9     | Distractor5  |                      |
| 10    | Distractor6  |                      |
| 11    | Claim3       | Empirical            |
| 12    | Distractor7  |                      |
| 13    | Claim10      |                      |
| 14    | Distractor8  |                      |
| 15    | Claim9       | Sloppy               |
| 16    | Distractor9  |                      |
| 17    | Distractor10 |                      |
| 18    | Claim12      |                      |
| 19    | Claim4       |                      |
| 20    | Distractor11 |                      |
| 21    | Claim7       | Relevant misconduct  |
| 22    | Distractor12 |                      |
| 23    | Claim1       | Conflict of interest |
| 24    | Claim2       |                      |
