# Supplementary material for: The effect of ad hominem attacks on the evaluation of claims promoted by scientists
Source: PLoS One. 2018 Jan 30;13(1):e0192025. doi: 10.1371/journal.pone.0192025 (PMC5790247; doi:10.1371/journal.pone.0192025)
Supplement: S3 File — (CSV) [file pone.0192025.s005.csv]

	indicates whether participant completed the paper or online version fo the questionnaire	this indicates the questionnaire variant (there were 8 of them)	attitude difference scores are in this column and next 5										questionnaire was only offered at students in the institutions listed below. For reasons unknown to us some students did not select their actual institution and instead selected "other"
participant#	paper or online	questiionnaire variant	empirical	relative misconduct	past misconduct	conflict of interest	education	sloppy	gender	age	class rank	course	institution
1	paper	4	-2	-1.39	-0.562	-1.348	-0.518	-0.705	Female	22	College Junior	cog psy	Salem State College
2	paper	8	-0.705	-0.348	-0.39	-0.562	-1	0.482	Female	21	College Junior	cog psy	Salem State College
3	paper	1	1.898	1.456	1.956	-0.73	1.035	0.027	Female	21	College Senior	cog psy	Salem State College
4	paper	6	-1.39	-0.518	-0.705	0	0.438	0.652	Female	19	College Sophomore	cog psy	Salem State College
5	paper	7	2.456	2.035	1.027	1.898	0.956	2.27	Female	21	College Senior	cog psy	Salem State College
6	paper	5	2.027	1.27	-1.544	-0.044	-0.102	-1.965	Female	20	College Junior	cog psy	Salem State College
7	paper	3	-0.044	0.027	-1.102	-0.965	2.27	0.456	Female	19	College Sophomore	cog psy	Salem State College
8	paper	2	0.438	-0.705	-2	1.482	0.652	-2.39	Female	23	College Senior	cog psy	Salem State College
9	paper	2	-1.562	0.295	0	-1.518	-1.348	-0.39	Female	22	College Senior	cog psy	Salem State College
10	paper	4	-2	-2.39	-1.562	-0.348	0.482	0.295	Female	20	College Junior	cog psy	Salem State College
11	paper	4	-2	0.61	0.438	-0.348	0.482	1.295	Female	22	College Sophomore	intro psy	Salem State College
12	paper	3	0.956	-0.973	-2.102	-0.965	-0.73	2.456	Female	19	College Freshman	intro psy	Columbus State Community College
13	paper	1	-2.102	-1.544	-1.044	-0.73	-1.965	1.027	Male	19	College Freshman	intro psy	Columbus State Community College
14	paper	2	-1.562	-2.705	1	0.482	-0.348	-3.39	Male	25	College Freshman	intro psy	Columbus State Community College
15	paper	5	-1.973	-0.73	-1.544	1.956	1.898	2.035	Male	19	College Freshman	intro psy	Columbus State Community College
16	paper	8	1.295	-0.348	1.61	1.438	1	-0.518	Male	24	College Freshman	intro psy	Columbus State Community College
17	paper	5	1.027	0.27	-1.544	-0.044	-0.102	0.035	Female	18	College Freshman	intro psy	Columbus State Community College
18	paper	4	-2	-0.39	-0.562	-1.348	0.482	-0.705	Female	20	College Sophomore	intro psy	Columbus State Community College
19	paper	3	-1.044	-0.973	-1.102	-0.965	1.27	0.456	Male	21	College Senior	intro psy	Columbus State Community College
20	paper	7	-1.544	0.035	1.027	-1.102	-0.044	-0.73	Male	22	College Freshman	intro psy	Columbus State Community College
21	paper	6	-0.39	-1.518	0.295	-1	-2.562	-2.348	Female	37	College Sophomore	intro psy	Columbus State Community College
22	paper	8	-0.705	-1.348	-0.39	-1.562	-1	0.482	Female	18	College Freshman	intro psy	Columbus State Community College
23	paper	1	-1.102	-0.544	-0.044	2.27	-0.965	-0.973	Female	19	College Freshman	intro psy	Columbus State Community College
24	paper	2	0.438	-0.705	-2	-1.518	-0.348	0.61	Female	18	College Freshman	intro psy	Columbus State Community College
25	paper	6	0.61	1.482	-0.705	-1	-1.562	-1.348	Male	27	College Freshman	intro psy	Columbus State Community College
26	paper	7	-0.544	1.035	-0.973	-3.102	0.956	0.27	Female	19	College Freshman	intro psy	Columbus State Community College
27	paper	5	-1.973	-0.73	0.456	0.956	-0.102	1.035	Male	23	College Freshman	intro psy	Columbus State Community College
28	paper	4	2	1.61	-2.562	-2.348	-0.518	2.295	Female	18	College Freshman	intro psy	Columbus State Community College
30	paper	2	0.438	-0.705	0	-0.518	0.652	1.61	Female	19	College Freshman	intro psy	Columbus State Community College
31	paper	1	1.898	-1.544	-2.044	-1.73	1.035	1.027	Male	19	College Freshman	intro psy	Columbus State Community College
32	paper	2	-1.562	-2.705	0	0.482	-1.348	0.61	Female	29	College Senior		Univeristy of Houston
33	paper	4	-2	0.61	1.438	1.652	0.482	0.295	Female	21	College Sophomore	Abnormal Psychology	Univeristy of Houston
34	paper	4	-2	-1.39	0.438	-1.348	2.482	2.295	Female	49	College Senior	Psyc 3301/HDFS	Univeristy of Houston
35	paper	7	1.456	-1.965	-0.973	-3.102	0.956	0.27	Male	19	College Junior	PSYC 2301: Intro to research methods	Univeristy of Houston
36	paper	2	0.438	-1.705	-2	-1.518	0.652	-1.39	Male	21	College Sophomore	PSYC 2301: Intro to research methods	Univeristy of Houston
37	paper	8	1.295	-1.348	0.61	-1.562	0	-0.518	Female	22	College Junior	Child development	Univeristy of Houston
38	paper	4	-1	-0.39	0.438	-1.348	-1.518	-1.705	Female	24	College Junior	Abnormal Psychology	Univeristy of Houston
39	paper	7	2.456	-2.965	-2.973	-0.102	-2.044	-0.73	Female	19	College Freshman	HDFS 1300	Univeristy of Houston
40	paper	5	-2.973	-0.73	-1.544	-3.044	-2.102	0.035	Female	20	College Sophomore	Psychology of adolescence	Univeristy of Houston
41	paper	1	-2.102	1.456	2.956	0.27	0.035	1.027	Male	21	College Sophomore	Child development	Univeristy of Houston
42	paper	3	-1.044	-0.973	-1.102	-2.965	1.27	1.456	Male	21	College Junior	Psychology of personality	Univeristy of Houston
43	paper	5	-1.973	0.27	-1.544	-0.044	-0.102	0.035	Female	23	College Senior	Physiological Psychology	Univeristy of Houston
44	paper	2	-1.562	-2.705	-1	2.482	-0.348	1.61	Female	26	College Senior	Psychology of Law	Univeristy of Houston
45	paper	3	0.956	-2.973	-1.102	-1.965	-0.73	1.456	Male	22	College Junior		Univeristy of Houston
46	paper	7	0.456	0.035	-0.973	0.898	-2.044	-0.73	Female	21	College Junior	Psychology of personality	Univeristy of Houston
47	paper	1	1.898	-1.544	-1.044	0.27	-1.965	0.027	Female	24	College Junior	HDFS 1300	Univeristy of Houston
48	paper	1	-0.102	-0.544	-1.044	1.27	0.035	-1.973	Male	20	College Freshman	Intro to Psychology	Univeristy of Houston
49	paper	5	1.027	1.27	0.456	-0.044	0.898	2.035	Female	21	College Junior	Intro to Psychology	Univeristy of Houston
50	paper	8	0.295	-0.348	0.61	0.438	-1	0.482	Female	21	College Junior	PSYC 2301: Intro to research methods	Univeristy of Houston
51	paper	2	-1.562	-2.705	-3	-1.518	1.652	-0.39	Female	24	College Junior	Research Methods	Univeristy of Houston
52	paper	2	-2.562	0.295	-1	-0.518	-1.348	1.61	Female	24	College Freshman	Intro to Psychology	Columbus State Community College
53	paper	7	-0.544	1.035	-0.973	-2.102	-2.044	0.27	Male	21	College Junior	Intro to Psychology	Columbus State Community College
54	paper	7	-1.544	0.035	-1.973	-2.102	-1.044	1.27	Male	28	College Sophomore		Columbus State Community College
55	paper	6	0.61	-1.518	-1.705	0	1.438	0.652	Female	19	College Sophomore	Intro to Psychology	Columbus State Community College
56	paper	6	1.61	-0.518	-0.705	2	0.438	2.652	Male	19	College Sophomore	Intro to Psychology	Columbus State Community College
57	paper	8	-1.705	2.652	-1.39	-2.562	-1	1.482	Female	31	College Sophomore	Intro to Psychology	Columbus State Community College
58	paper	3	-0.044	-0.973	-1.102	-2.965	-0.73	-1.544	Male	30	College Sophomore	Intro to Psychology	Columbus State Community College
59	paper	6	0.61	-1.518	1.295	-2	0.438	-0.348	Female	32	College Freshman	Intro to Psychology	Columbus State Community College
60	paper	5	-1.973	-0.73	-0.544	0.956	-2.102	-1.965	Female	19	College Freshman	Intro to Psychology	Columbus State Community College
61	paper	3	-0.044	0.027	-1.102	0.035	3.27	-1.544	Female	18	College Freshman	Intro to Psychology	Columbus State Community College
62	paper	4	2	-0.39	-2.562	-2.348	1.482	1.295	Female	19	College Freshman	Intro to Psychology	Columbus State Community College
63	paper	3	0.956	0.027	-0.102	-0.965	2.27	0.456	Female	18	College Freshman	Intro to Psychology	Columbus State Community College
64	paper	2	-0.562	-0.705	0	-1.518	-1.348	0.61	Female	33	College Freshman	Intro to Psychology	Columbus State Community College
65	paper	1	-3.102	-2.544	0.956	-1.73	0.035	0.027	Female	47	College Sophomore	Intro to Psychology	Columbus State Community College
66	paper	1	1.898	-2.544	-3.044	0.27	2.035	-1.973	Female	19	College Freshman	Intro to Psychology	Columbus State Community College
67	paper	7	1.456	1.035	-0.973	-0.102	-0.044	-0.73	Female	21	College Junior	Intro to methods	Univeristy of Houston
68	paper	8	0.295	-1.348	-2.39	-1.562	-2	-0.518	Female	20	College Junior	HPFS 1300	Univeristy of Houston
69	paper	7	1.456	1.035	1.027	-0.102	-0.044	-0.73					Univeristy of Houston
70	paper	4	-2	-0.39	-0.562	0.652	-1.518	1.295	Female	19	College Sophomore	Psychology 1300	Univeristy of Houston
71	paper	7	-0.544	-2.965	-1.973	0.898	-1.044	0.27	Female	18	College Freshman	Social psychology	Univeristy of Houston
72	paper	8	0.295	-0.348	-2.39	0.438	-2	0.482	Female	21	College Junior	Cognitive psychology	Univeristy of Houston
73	paper	2	-0.562	2.295	1	0.482	1.652	1.61	Female	19	College Sophomore	Psychology of personality	Univeristy of Houston
74	paper	3	-0.044	-1.973	-1.102	-0.965	-0.73	0.456	Female	19	College Freshman	Statistics	Univeristy of Houston
75	paper	5	1.027	-0.73	1.456	-2.044	-2.102	-1.965	Female	21	College Senior	Psychology of adolescence	Univeristy of Houston
76	paper	6	-2.39	-1.518	-2.705	-1	-0.562	-2.348	Male	42	College Junior	Human and family development	Univeristy of Houston
77	paper	2	-1.562	-1.705	-2	-1.518	-0.348	-0.39	Female	20	College Junior	Prenatal and infant development	Univeristy of Houston
78	paper	1	-2.102	-1.544	-2.044	-0.73	-0.965	-2.973	Female	19	College Sophomore	Adolescence: Psych 2351	Univeristy of Houston
79	paper	4	-2	-0.39	-1.562	1.652	-0.518	-1.705	Female	21	College Junior	Psychology of personality	Univeristy of Houston
80	paper	3	-1.044	-1.973	-1.102	-1.965	-0.73	-0.544	Female	19	College Sophomore	Development of contemporary families	Univeristy of Houston
81	paper	1	-3.102	-2.544	-3.044	-1.73	-1.965	-2.973	Female	28	College Senior	Human ecology of adult development	Univeristy of Houston
82	paper	2	-0.562	-2.705	-2	-1.518	-1.348	-0.39	Female	31	College Senior	Social psychology	Univeristy of Houston
83	paper	8	0.295	-1.348	0.61	1.438	-1	-1.518	Female	20	College Sophomore		Univeristy of Houston
84	paper	3	-3.044	0.027	1.898	1.035	2.27	2.456	Female	21	College Junior	PSYC 2301: Intro to research methods	Univeristy of Houston
85	paper	2	-1.562	-2.705	-3	-1.518	-0.348	0.61	Female	20	College Sophomore	PSYC 2380: Social psychology	Univeristy of Houston
86	paper	3	-0.044	-2.973	-2.102	-1.965	-0.73	-2.544	Female	22	College Junior	Intro to methods	Univeristy of Houston
87	paper	7	-2.544	1.035	0.027	-1.102	-0.044	-1.73	Female	20	College Senior		Univeristy of Houston
88	paper	6	-2.39	-0.518	0.295	-2	-0.562	-0.348	Female	32	College Senior	PSYC 2301: Intro to research methods	Univeristy of Houston
89	paper	3	0.956	0.027	-1.102	-1.965	-0.73	1.456	Female	22	College Junior	PSYC 2301: Intro to research methods	Univeristy of Houston
90	paper	1	-3.102	-2.544	-3.044	-0.73	-1.965	-1.973	Female	21	College Junior	Child development	Univeristy of Houston
91	paper	4	0	-1.39	1.438	0.652	1.482	2.295	Female	23	College Senior	Psychology of personality	Univeristy of Houston
92	paper	3	0.956	-2.973	-2.102	-1.965	-0.73	2.456	Female	20	College Junior	Psychology of adolescence	Univeristy of Houston
93	paper	5	-0.973	1.27	0.456	-1.044	-0.102	0.035	Male	20	College Sophomore	Industrial & Organizational Psych	Univeristy of Houston
94	paper	1	0.898	0.456	0.956	-0.73	0.035	-1.973	Female	22	College Senior	Psychology of adolescence	Univeristy of Houston
95	paper	7	1.456	2.035	0.027	-2.102	-2.044	-0.73	Female	22	College Junior	Abnormal Psychology	Univeristy of Houston
96	paper	1	-0.102	-1.544	-1.044	-0.73	0.035	1.027	Female	25	College Junior	Intro to Statistics	Univeristy of Houston
97	paper	2	-0.562	1.295	-2	-1.518	0.652	-0.39	Female	22	College Senior	Psychology of adolescence	Univeristy of Houston
258004	online	3	-1.044	-0.973	-0.102	-1.965	-1.73	-0.544	Female	18	College Freshman	Introduction to Psychology II	University of Cincinnati. Clermont College
258007	online	8	-0.705	-1.348	-1.39	-1.562	-2	-0.518	Female	19	College Freshman	Introduction to Psychology 2	University of Cincinnati. Clermont College
258015	online	1	-2.102	-1.544	-2.044	-0.73	-1.965	-1.973	Female	20	College Freshman	Introduction to Psychology	University of Cincinnati. Clermont College
258046	online	7	-2.544	-1.965	-0.973	-2.102	-2.044	-1.73	Female	30	College Freshman	Psychology 102	University of Cincinnati. Clermont College
258106	online	5	-1.973	0.27	-0.544	-1.044	0.898	2.035	Female	18	College Freshman	Introduction to Psychology 102	University of Cincinnati. Clermont College
258110	online	4	0	-0.39	1.438	-1.348	0.482	-0.705	Male	26	Bachelor's Degree (or more) Completed	Intro to Psych II	University of Cincinnati. Clermont College
258220	online	6	0.61	-2.518	-2.705	-3	-0.562	-0.348	Female	29	College Freshman	intro psych 2	Other
258316	online	3	-2.044	-2.973	-2.102	-1.965	0.27	1.456	Female	19	College Freshman	Introduction to Psychology II	University of Cincinnati. Clermont College
258652	online	1	-0.102	1.456	-2.044	0.27	-1.965	0.027	Female	27	Bachelor's Degree (or more) Completed	34-Psychology-102-004 Introduction to Psychology 2	University of Cincinnati. Clermont College
258656	online	2	0.438	-1.705	1	0.482	-2.348	1.61	Female	19	College Freshman	Introduction to Psychology	University of Cincinnati. Clermont College
258714	online	2	-0.562	-1.705	-2	-1.518	0.652	-1.39	Male	37	College Sophomore	Psy II	University of Cincinnati. Clermont College
259768	online	5	-2.973	0.27	-0.544	-0.044	-1.102	1.035	Female	44	College Junior	psychology	University of Cincinnati. Clermont College
259781	online	4	1	-0.39	1.438	1.652	1.482	1.295	Female	18	College Freshman	Introduction to Psychology 2	University of Cincinnati. Clermont College
259850	online	8	-1.705	-0.348	-1.39	-1.562	0	0.482	Female	20	College Junior	Intro to Psychology II	University of Cincinnati. Clermont College
259885	online	7	0.456	0.035	-0.973	-2.102	0.956	0.27	Male	26	College Sophomore	psych 2	University of Cincinnati. Clermont College
260006	online	8	0.295	-0.348	-0.39	0.438	2	0.482	Female	18	College Freshman	Psychology 202	University of Cincinnati. Clermont College
260059	online	8	2.295	2.652	-2.39	2.438	-2	-1.518	Female	18	College Freshman	Introduction to psychology 102	University of Cincinnati. Clermont College
260090	online	3	-2.044	-2.973	-2.102	-2.965	-0.73	-0.544	Male	18	College Freshman	Introduction to Psychology 102	University of Cincinnati. Clermont College
260104	online	2	-0.562	1.295	-1	-0.518	-0.348	-0.39	Female	21	College Sophomore		University of Cincinnati. Clermont College
260356	online	5	-2.973	-1.73	-2.544	-0.044	1.898	2.035	Male	27	College Sophomore	Introduction to Psychology II	University of Cincinnati. Clermont College
260391	online	5	0.027	0.27	0.456	-2.044	0.898	0.035	Female	18	College Freshman	Intro to Psych II	University of Cincinnati. Clermont College
260417	online	1	-1.102	0.456	-1.044	0.27	1.035	0.027	Female		College Sophomore	Psychology 102	University of Cincinnati. Clermont College
260529	online	5	-1.973	-1.73	-1.544	-0.044	-1.102	0.035	Male	19	College Freshman	Psychology	University of Cincinnati. Clermont College
260667	online	4	-2	-2.39	-0.562	0.652	0.482	0.295	Female	24	College Sophomore	into to psych 2	University of Cincinnati. Clermont College
260832	online	6	-3.39	-2.518	-1.705	0	-1.562	0.652	Female	18	College Freshman	Into to Psych 101 and 102	University of Cincinnati. Clermont College
261547	online	7	-0.544	-2.965	-0.973	-1.102	0.956	-1.73	Female	29	Bachelor's Degree (or more) Completed	Psychology 102	University of Cincinnati. Clermont College
261624	online	7	1.456	-0.965	1.027	1.898	0.956	3.27	Female	20	College Sophomore	Intro to Psychology II	University of Cincinnati. Clermont College
261647	online	7	1.456	-1.965	1.027	0.898	0.956	1.27	Female	20	College Sophomore	Introduction to Psychology 2	University of Cincinnati. Clermont College
261903	online	4	-1	-0.39	0.438	-0.348	-0.518	2.295	Male	18	College Freshman	Introduction to Psychology	University of Cincinnati. Clermont College
261912	online	1	-2.102	-2.544	-1.044	-1.73	-1.965	-2.973	Male	24	College Freshman	Introduction to Psychology II	University of Cincinnati. Clermont College
262113	online	3	0.956	0.027	-0.102	0.035	0.27	1.456	Female	27	College Sophomore		University of Cincinnati. Clermont College
262124	online	8	2.295	-2.348	1.61	0.438	2	-2.518	Female	18	College Freshman	Psychology 102	University of Cincinnati. Clermont College
262155	online	7	-1.544	-1.965	-1.973	-2.102	-0.044	-0.73	Female	19	College Freshman	Introduction to Pyschology II	University of Cincinnati. Clermont College
262442	online	1	-0.102	-1.544	-3.044	-1.73	-2.965	-1.973	Female	26	College Freshman	psychology 2	University of Cincinnati. Clermont College
262467	online	6	-1.39	0.482	0.295	3	0.438	-0.348	Female	19	College Freshman	psych 2	University of Cincinnati. Clermont College
262546	online	3	-0.044	1.027	0.898	1.035	-1.73	0.456	Male	29	Bachelor's Degree (or more) Completed	Intro to Psych. II	University of Cincinnati. Clermont College
262572	online	1	-0.102	1.456	-0.044	0.27	1.035	1.027	Female	20	College Junior	Introduction to Psychology	University of Cincinnati. Clermont College
262933	online	6	-0.39	-0.518	0.295	-1	0.438	-1.348	Male	20	College Sophomore	intro to psych 2	University of Cincinnati. Clermont College
263071	online	2	-1.562	0.295	-1	0.482	-1.348	0.61	Female	19	College Freshman	Intro to Psychology 2	University of Cincinnati. Clermont College
263113	online	6	-2.39	-1.518	-1.705	1	0.438	0.652	Male	19	College Freshman	Intro to Psych	University of Cincinnati. Clermont College
263137	online	6	-1.39	-2.518	-2.705	-2	-2.562	-0.348	Female	24	College Sophomore	Introduction to Psychology 2	University of Cincinnati. Clermont College
263146	online	1	-1.102	-1.544	-1.044	-0.73	-0.965	-0.973	Male	19	College Freshman		University of Cincinnati. Clermont College
263605	online	1	-0.102	0.456	0.956	2.27	-0.965	0.027	Female	20	College Sophomore	Psychology 2	University of Cincinnati. Clermont College
263887	online	2	1.438	-1.705	0	0.482	1.652	1.61	Male	20	College Junior	Introduction to Psychology 102	University of Cincinnati. Clermont College
264169	online	6	-0.39	0.482	-0.705	-2	-0.562	-1.348	Female	18	College Freshman	introduction to psychology II	University of Cincinnati. Clermont College
264185	online	7	-2.544	-1.965	1.027	-3.102	-0.044	-1.73	Female	21	College Sophomore	Psychology 2	University of Cincinnati. Clermont College
270913	online	1	0.898	-1.544	-2.044	-0.73	-1.965	2.027	Female	18	College Freshman	Psychology 110	Lafayette College
270958	online	4	-2	0.61	-1.562	-1.348	-1.518	-1.705	Female	19	College Freshman	Introduction to Psychology	Lafayette College
270960	online	2	1.438	0.295	0	-0.518	-1.348	0.61	Female	18	College Freshman	Introduction to Psychology	Lafayette College
270989	online	2	0.438	0.295	-3	-2.518	1.652	0.61	Female	19	College Sophomore	Quantitative Methods- psych120	Lafayette College
271046	online	4	-2	-0.39	-1.562	-1.348	0.482	0.295	Female	18	College Freshman	Intro to Psych, Psych 110	Lafayette College
271047	online	4	-1	-0.39	1.438	3.652	1.482	1.295	Female	19	College Sophomore	Introduction to Psychology	Lafayette College
271248	online	2	-1.562	-1.705	-2	-1.518	-0.348	-2.39	Male	19	College Freshman	Introduction to Psychology	Lafayette College
271267	online	1	-1.102	0.456	-2.044	1.27	0.035	0.027	Male	20	College Junior	Psychology 110	Lafayette College
271290	online	3	-1.044	-1.973	-2.102	-1.965	1.27	-1.544	Female	18	College Freshman	Introduction to Psychology	Lafayette College
271514	online	5	1.027	-0.73	0.456	-1.044	0.898	0.035	Male	22	College Junior	Introduction to Psychology	Lafayette College
271650	online	5	-0.973	-0.73	-1.544	-2.044	0.898	-1.965	Female	19	College Freshman	intro to psych	Lafayette College
271737	online	2	-1.562	-0.705	0	-0.518	0.652	0.61	Female	19	College Freshman	Introduction to Psychology, section 01	Lafayette College
271967	online	3	-1.044	1.027	-1.102	-1.965	-0.73	1.456	Female	18	College Freshman	Intro to Psych 110	Lafayette College
272246	online	6	-0.39	-1.518	-0.705	-1	0.438	-1.348	Female	19	College Freshman	Introduction to Psychology	Lafayette College
272252	online	5	-0.973	-1.73	-2.544	-2.044	0.898	-0.965	Female	18	College Freshman	Introduction to Psychology	Lafayette College
272264	online	3	-3.044	-0.973	-2.102	-0.965	1.27	0.456	Female	18	College Freshman	Introduction to Psychology	Lafayette College
272522	online	8	-1.705	-0.348	0.61	-1.562	1	0.482	Female	18	College Freshman	Introduction to Psychology	Lafayette College
272527	online	1	-1.102	1.456	-1.044	2.27	0.035	1.027	Female	19	College Freshman	Quantitative Methods	Lafayette College
272539	online	8	-0.705	-0.348	-2.39	0.438	0	0.482	Male	18	College Freshman	Introduction to Psychology	Lafayette College
272583	online	5	-1.973	0.27	1.456	-2.044	0.898	1.035	Female	19	College Freshman	Introductoin to Psychology	Lafayette College
272670	online	1	-3.102	3.456	-1.044	-1.73	1.035	0.027	Female	19	College Freshman		Lafayette College
272725	online	6	-1.39	-1.518	-1.705	0	0.438	-0.348	Female	18	College Freshman	Introduction to Psychology	Lafayette College
272843	online	6	1.61	-0.518	0.295	0	-0.562	-1.348	Male	22	College Junior	Design and Analysis. Talarico	Lafayette College
272876	online	7	-1.544	-0.965	-0.973	0.898	0.956	-0.73	Male	19	College Freshman	Introduction to Psychology	Lafayette College
272915	online	1	-0.102	0.456	-1.044	0.27	-0.965	-0.973	Male	18	College Freshman	Introduction to Psychology	Lafayette College
273054	online	1	-1.102	0.456	-0.044	-0.73	0.035	1.027	Female	18	College Freshman	Psychology 120	Lafayette College
273231	online	2	-1.562	-1.705	-3	-1.518	2.652	-0.39	Male	18	College Freshman	Introduction to Psychology	Lafayette College
273269	online	1	1.898	-0.544	-2.044	2.27	1.035	0.027	Male	19	College Freshman	Introduction to Psychology	Lafayette College
273427	online	3	-1.044	-1.973	-2.102	0.035	-0.73	-0.544	Female	19	College Freshman	Intro to Psych	Lafayette College
273462	online	7	-0.544	-0.965	-0.973	-1.102	-0.044	-0.73	Male	21	College Senior	Introduction to Psychology	Lafayette College
273566	online	7	-1.544	-0.965	0.027	-0.102	-0.044	1.27	Female	18	College Freshman	Quantitative Methods	Lafayette College
273617	online	7	-2.544	-2.965	-0.973	0.898	-0.044	-0.73	Female	19	College Freshman	Psychology: Quantitative Methods (Dr. Alan at 8am)	Lafayette College
273673	online	2	1.438	0.295	2	0.482	0.652	0.61	Female	19	College Freshman	Quantitative Methods in Psychology	Lafayette College
273915	online	2	-1.562	-0.705	-3	-1.518	-0.348	-2.39	Male	19	College Sophomore	Design and Analysis	Lafayette College
274120	online	4	1	-0.39	-0.562	1.652	1.482	-0.705	Female	19	College Freshman	Introduction to Psychology	Lafayette College
274336	online	4	2	0.61	-2.562	-0.348	0.482	1.295	Female	18	College Freshman	Introduction to Psychology	Lafayette College
274864	online	3	-0.044	0.027	-2.102	2.035	-0.73	-1.544	Male	20	College Sophomore	Introduction to Psychology	Lafayette College
274925	online	6	-2.39	-1.518	-0.705	-3	1.438	-1.348	Female	19	College Freshman	Introduction to Psychology 110	Lafayette College
274936	online	6	-0.39	0.482	1.295	-1	0.438	-0.348	Male	19	College Sophomore	Quantitative Methods (Allan)	Lafayette College
274942	online	5	0.027	1.27	0.456	-0.044	0.898	1.035	Female	18	College Freshman	Introduction to Psychology	Lafayette College
274981	online	4	-2	-0.39	-1.562	-1.348	-0.518	0.295	Female	19	College Freshman	Introduction to Psychology	Lafayette College
274998	online	8	-1.705	0.652	-2.39	0.438	1	0.482	Female	22	College Senior	Health Psychology	Lafayette College
275062	online	6	0.61	-0.518	-0.705	1	-1.562	-1.348	Male	19	College Freshman	Introduction to Psychology	Lafayette College
275231	online	6	-0.39	1.482	1.295	1	2.438	-0.348	Male	19	College Freshman	Introduction of Psychology	Lafayette College
275335	online	3	-2.044	-1.973	-2.102	-1.965	0.27	0.456	Female	19	College Freshman	Intro to Psych 11o. Prof Childs Section 2 (10AM)	Lafayette College
275498	online	7	-0.544	-2.965	1.027	-0.102	0.956	-0.73	Male	21	College Sophomore	Introduction to Psychology	Lafayette College
276176	online	5	1.027	0.27	-0.544	0.956	0.898	0.035	Male	19	College Freshman	Introduction to Psychology	Lafayette College
276482	online	8	-0.705	-2.348	-1.39	-1.562	-1	0.482	Male	18	College Freshman	Introduction to Psychology	Lafayette College
276565	online	8	0.295	-1.348	-2.39	-1.562	0	0.482	Female	21	College Junior	PSY110-2, Introduction to Psychology	Lafayette College
276656	online	8	1.295	1.652	0.61	1.438	1	0.482	Female	19	College Freshman	Introduction to Psychology	Lafayette College
276661	online	3	0.956	2.027	-2.102	2.035	2.27	2.456	Female	19	College Freshman	Introduction to Psychology	Lafayette College
276740	online	5	-0.973	-1.73	-1.544	-1.044	-0.102	-1.965	Female	20	College Sophomore	Quantitative Methods	Lafayette College
276747	online	7	0.456	1.035	0.027	0.898	0.956	-0.73	Male	19	College Freshman	introduction to psychology	Lafayette College
277091	online	7	-1.544	-2.965	-1.973	-2.102	-1.044	-0.73	Male	19	College Freshman	Introduction to Psychology	Lafayette College
277606	online	8	-0.705	-1.348	-3.39	-1.562	0	0.482	Male	19	College Freshman	Introduction to Psychology	Lafayette College
279291	online	2	0.438	0.295	-2	-0.518	-1.348	-1.39	Male	21	College Junior	Introduction to Psychology	Lafayette College
280250	online	3	-1.044	-1.973	-0.102	0.035	0.27	-0.544	Female	19	College Freshman	quantitative methods	Lafayette College
280379	online	4	-2	-2.39	-1.562	-1.348	-0.518	0.295	Female	20	College Junior	Health Psychology with Professor Bookwala	Lafayette College
280681	online	2	-0.562	0.295	0	0.482	0.652	1.61	Male	19	College Freshman	Introduction to Pschology	Lafayette College
280687	online	4	-1	-1.39	-2.562	1.652	1.482	2.295	Female	19	College Freshman	Quantitative Methods	Lafayette College
280696	online	2	-1.562	0.295	0	1.482	2.652	0.61	Male	20	College Sophomore	Introduction to psychology	Lafayette College
280869	online	7	-0.544	-1.965	1.027	0.898	-0.044	0.27	Female	18	College Freshman	Introduction To Psychology	Lafayette College
283890	online	5	0.027	-1.73	1.456	0.956	1.898	-2.965	Male	19	College Freshman	Psychology	University of Cincinnati. Clermont College
283893	online	6	-3.39	-2.518	-2.705	-1	0.438	0.652	Male	19	College Freshman	Introduction to Psychology	University of Cincinnati. Clermont College
283899	online	6	-1.39	0.482	0.295	0	1.438	1.652	Female	19	College Freshman	Introduction to Psycology	University of Cincinnati. Clermont College
283900	online	1	-2.102	-0.544	0.956	-0.73	1.035	1.027	Female	20	College Sophomore	Intro to Psych 1	University of Cincinnati. Clermont College
283901	online	8	0.295	0.652	0.61	0.438	-2	-2.518	Male	27	College Freshman	Psychology	University of Cincinnati. Clermont College
283903	online	8	0.295	-0.348	-1.39	-2.562	1	-0.518	Female	19	College Freshman	Introduction to Psychology 101-004 with Michael Kramer	University of Cincinnati. Clermont College
283916	online	5	2.027	-1.73	-2.544	-2.044	0.898	-2.965	Female	32	College Freshman	Intro to Psychology	University of Cincinnati. Clermont College
283953	online	3	-2.044	-2.973	-3.102	-2.965	-1.73	-2.544	Male	32	College Freshman	Intro to Psychology I	University of Cincinnati. Clermont College
283991	online	5	-1.973	-0.73	-1.544	-1.044	-1.102	0.035	Female	19	College Sophomore	Induction to Psycology	University of Cincinnati. Clermont College
283993	online	4	-1	-1.39	-1.562	-2.348	0.482	-0.705	Male	20	College Sophomore	34-psyc-101-004 psychology 1	University of Cincinnati. Clermont College
284000	online	7	1.456	-1.965	-1.973	-1.102	-2.044	-1.73	Male	24	College Freshman	Introduction to Psychology 101	University of Cincinnati. Clermont College
284010	online	6	-2.39	0.482	-0.705	-2	-0.562	-0.348	Female	25	College Freshman		University of Cincinnati. Clermont College
284013	online	7	-1.544	-1.965	0.027	0.898	-2.044	-0.73	Female	23	College Freshman	intro to psychology	University of Cincinnati. Clermont College
284045	online	4	1	-0.39	1.438	1.652	0.482	2.295	Female	21	College Freshman	Intro to Psychology	University of Cincinnati. Clermont College
284060	online	2	-1.562	1.295	0	1.482	2.652	1.61	Female	19	College Freshman	Introduction to Psychology	University of Cincinnati. Clermont College
284064	online	6	-1.39	-1.518	-1.705	1	-0.562	-1.348	Male	46	College Freshman	Psychology	University of Cincinnati. Clermont College
284072	online	2	-0.562	2.295	2	0.482	2.652	0.61	Female	19	College Freshman	Introduction to Psychology	University of Cincinnati. Clermont College
284076	online	4	-1	0.61	-1.562	-1.348	0.482	1.295	Male	21	College Freshman	Introduction to Psychology	University of Cincinnati. Clermont College
284163	online	3	-2.044	-0.973	-2.102	-1.965	1.27	0.456	Male	19	College Freshman	Intro to Psychology	University of Cincinnati. Clermont College
284178	online	5	1.027	-1.73	-1.544	0.956	-0.102	0.035	Male	18	College Freshman	Introduction to Psychology	University of Cincinnati. Clermont College
284218	online	8	-0.705	-2.348	0.61	-2.562	-2	-1.518	Male	20	College Sophomore	Introduction to Psychology	University of Cincinnati. Clermont College
284224	online	6	-0.39	-1.518	-0.705	-3	-2.562	-0.348	Female	19	College Freshman	introduction to psychology 101	University of Cincinnati. Clermont College
284242	online	4	-3	0.61	-1.562	-2.348	-2.518	-2.705	Female	55	College Freshman	introduction to psychology	University of Cincinnati. Clermont College
284260	online	2	1.438	0.295	-3	-1.518	-0.348	0.61	Male	19	College Freshman	Introduction to Psychology	University of Cincinnati. Clermont College
284275	online	3	2.956	-1.973	-1.102	-1.965	2.27	1.456	Male	21	College Freshman	Intro to Psychology I	University of Cincinnati. Clermont College
284561	online	5	0.027	-0.73	0.456	-2.044	-1.102	-0.965	Female	36	College Freshman	Psychology 101	University of Cincinnati. Clermont College
284574	online	7	-1.544	-1.965	-1.973	-2.102	-0.044	0.27	Female	18	College Freshman	Introduction to Psychology	University of Cincinnati. Clermont College
284580	online	8	1.295	-0.348	0.61	0.438	-1	-0.518	Female	32	College Freshman	Introduction to Psychology	University of Cincinnati. Clermont College
284655	online	4	1	-0.39	0.438	-0.348	-0.518	-0.705	Female	19	College Freshman	Introduction to Psychology	University of Cincinnati. Clermont College
284711	online	7	-1.544	-0.965	0.027	-0.102	-1.044	0.27	Female	19	College Freshman	introduction to psychology	University of Cincinnati. Clermont College
284722	online	6	-2.39	-1.518	-2.705	1	1.438	1.652	Female	20	College Freshman	Introduction to Psychology 101	University of Cincinnati. Clermont College
284764	online	7	-2.544	-2.965	1.027	-1.102	-0.044	1.27	Female	18	College Freshman	Introduction to Psychology	University of Cincinnati. Clermont College
284873	online	6	0.61	0.482	-1.705	0	-0.562	-0.348	Female	44	College Junior	Intro to Psych	University of Cincinnati. Clermont College
285021	online	3	-2.044	0.027	-0.102	0.035	0.27	-1.544	Female	20	College Sophomore	Introduction to Psychology	University of Cincinnati. Clermont College
285076	online	5	0.027	-0.73	0.456	0.956	-0.102	1.035	Female	24	College Sophomore	Introduction to Psychology	University of Cincinnati. Clermont College
285150	online	1	-1.102	-1.544	-3.044	-1.73	-1.965	-1.973	Female	19	College Freshman	Intro into Psychology 1	University of Cincinnati. Clermont College
285162	online	5	-2.973	-1.73	0.456	-3.044	-1.102	0.035	Female	19	College Sophomore	Into to Pysch I, 003 with Dr. Kramer	University of Cincinnati. Clermont College
285165	online	3	-2.044	-1.973	-2.102	1.035	-0.73	-2.544	Male	32	College Freshman	Psyc 1	University of Cincinnati. Clermont College
285218	online	8	1.295	0.652	0.61	-1.562	1	0.482	Female	20	College Junior	Introduction to Psychology	University of Cincinnati. Clermont College
285259	online	2	0.438	-2.705	-2	-1.518	0.652	-0.39	Male	18	College Freshman	Introduction to Psychology 101	University of Cincinnati. Clermont College
285329	online	1	-2.102	1.456	0.956	-0.73	0.035	-0.973	Female	20	College Sophomore		Other
285786	online	4	-3	-2.39	-0.562	-2.348	-1.518	-1.705	Male	25	College Sophomore	intro to psych1ology	University of Cincinnati. Clermont College
285962	online	2	0.438	0.295	1	-0.518	0.652	0.61	Female	27	College Freshman	introduction to psychology	University of Cincinnati. Clermont College
286186	online	7	1.456	1.035	-1.973	-2.102	-0.044	-0.73	Male	22	College Freshman	Introduction to Psychology 101	University of Cincinnati. Clermont College
286269	online	4	0	-0.39	-0.562	0.652	-1.518	1.295	Female	26	College Sophomore	psych 11	University of Cincinnati. Clermont College
286319	online	6	-0.39	-0.518	-0.705	0	0.438	0.652	Female	20	College Sophomore	introduction to psychology	University of Cincinnati. Clermont College
286428	online	3	-2.044	-2.973	-2.102	1.035	1.27	-1.544	Male	29	College Sophomore	intro to psych	University of Cincinnati. Clermont College
286501	online	1	-2.102	-2.544	-2.044	-1.73	-0.965	1.027	Female	54	College Sophomore	Introduction to Psychology	Columbus State Community College
286545	online	1	-3.102	2.456	-0.044	-0.73	2.035	-1.973	Female	19	College Freshman	Introduction to Psychology 100	Columbus State Community College
286576	online	7	0.456	-0.965	1.027	-1.102	-0.044	-1.73	Female	28	College Freshman	Psychology	Columbus State Community College
286701	online	1	-1.102	-0.544	-0.044	-1.73	-1.965	-0.973	Female	23	College Senior	Psychology Intro	Columbus State Community College
286741	online	5	0.027	-1.73	1.456	0.956	0.898	2.035	Male	19	College Sophomore	Introduction To Psychology - Heather Johnston	Columbus State Community College
286783	online	1	-0.102	-1.544	-2.044	-0.73	-1.965	0.027	Male	37	College Sophomore	introduction to Psychology	University of Cincinnati. Clermont College
286878	online	3	-1.044	-1.973	-1.102	-0.965	0.27	0.456	Female	18	College Freshman	psychology 1	University of Cincinnati. Clermont College
286880	online	5	2.027	1.27	1.456	-0.044	-1.102	-1.965	Female	20	College Sophomore	Intro to psychology	Columbus State Community College
286915	online	1	1.898	-2.544	-0.044	-1.73	2.035	0.027	Female	34	College Freshman	Introduction to Psychology	Columbus State Community College
287042	online	1	-0.102	0.456	-0.044	2.27	1.035	0.027	Female	28	College Sophomore	Psychology	Columbus State Community College
287134	online	7	-1.544	0.035	1.027	-1.102	-0.044	1.27	Female	21	College Freshman	Intro to psychology	Columbus State Community College
287145	online	2	-1.562	-1.705	-2	1.482	0.652	-1.39	Male		College Freshman		University of Cincinnati. Clermont College
287285	online	1	-0.102	-2.544	-3.044	-0.73	0.035	-2.973	Male	20	College Freshman	Introduction to Psychology	Columbus State Community College
287301	online	7	1.456	0.035	-0.973	0.898	-1.044	-1.73	Female	24	College Sophomore	Introduction to Psychology	Columbus State Community College
287630	online	4	-2	0.61	-0.562	0.652	1.482	1.295	Female	34	College Freshman	Psychology	University of Cincinnati. Clermont College
287668	online	3	-2.044	-0.973	-2.102	-0.965	-0.73	-0.544	Female	18	College Freshman	Intro to Psychology	University of Cincinnati. Clermont College
287838	online	4	-2	-2.39	-1.562	-2.348	-1.518	-1.705	Male	25	College Sophomore	intro psychology 1	University of Cincinnati. Clermont College
287881	online	5	1.027	-1.73	-1.544	-2.044	0.898	1.035	Male	34	College Freshman	Introduction to Psychology	University of Cincinnati. Clermont College
287936	online	4	-2	-1.39	-1.562	-1.348	-1.518	-0.705	Male	24	College Sophomore	introduction to Psychology	University of Cincinnati. Clermont College
287989	online	2	-0.562	-0.705	0	-1.518	0.652	0.61	Female	19	College Freshman	intro to psychology	University of Cincinnati. Clermont College
288091	online	3	0.956	-1.973	-2.102	1.035	0.27	1.456	Male	19	College Freshman		University of Cincinnati. Clermont College
288164	online	7	-2.544	-1.965	-1.973	0.898	-0.044	-0.73	Female	21	Bachelor's Degree (or more) Completed	Psych 100	Columbus State Community College
288775	online	4	-3	-0.39	-1.562	-1.348	-0.518	-1.705	Female	18	College Freshman	psychology	University of Cincinnati. Clermont College
288797	online	7	-0.544	-2.965	1.027	-1.102	1.956	-0.73	Male	24	Bachelor's Degree (or more) Completed	Introduction to Psychology	Columbus State Community College
289379	online	7	-0.544	-0.965	-0.973	-1.102	-1.044	2.27	Male	22	College Freshman	Introduction to Psychology	Columbus State Community College
296173	online	1	-0.102	1.456	-1.044	-0.73	0.035	-0.973	Female	43	College Freshman	Intro to Psychology	Columbus State Community College
296179	online	8	0.295	-2.348	-1.39	-0.562	0	0.482	Female	18	College Freshman	introduction to psychology	Columbus State Community College
296180	online	1	-1.102	-1.544	-2.044	-0.73	-1.965	0.027	Female	22	College Freshman	Introduction to Psychology	Columbus State Community College
296188	online	8	-2.705	-2.348	-2.39	2.438	-2	-2.518	Female	19	College Sophomore	Intro to Psychology	Columbus State Community College
296191	online	4	-1	1.61	0.438	-1.348	0.482	1.295	Female	21	College Freshman	Introduction to Psychology	Columbus State Community College
296202	online	2	-1.562	0.295	0	-1.518	-1.348	1.61	Female	19		indroduction to psychology	Columbus State Community College
296203	online	2	-1.562	-0.705	-2	-1.518	-1.348	-1.39	Female	20	College Junior	Psych 100	Columbus State Community College
296206	online	1	-2.102	0.456	-0.044	1.27	1.035	1.027	Female	34	College Freshman	Psycology 100	Columbus State Community College
296207	online	5	-1.973	2.27	-1.544	-2.044	1.898	0.035	Female	21	College Senior	Introduction to Psycology	Other
296209	online	3	-0.044	-2.973	-3.102	0.035	0.27	0.456	Female	31	Bachelor's Degree (or more) Completed	Intro to Psychology	Columbus State Community College
296216	online	6	-0.39	-0.518	0.295	-1	2.438	2.652	Female	19	College Freshman		Columbus State Community College
296222	online	2	-1.562	-1.705	-3	-1.518	-0.348	-0.39	Male	19	College Sophomore	Introduction to Psychology (Psychology 100)	Columbus State Community College
296229	online	8	-2.705	-2.348	0.61	-2.562	-2	0.482	Female	19	College Sophomore	Introduction to Psychology	Columbus State Community College
296234	online	8	-0.705	-0.348	0.61	-1.562	-1	0.482	Female	21	College Junior	Introduction to Psychology	Columbus State Community College
296235	online	3	-0.044	2.027	1.898	0.035	1.27	1.456	Female	53	College Junior	Introduction to Psychology	Columbus State Community College
296239	online	7	-0.544	-2.965	-0.973	-0.102	-1.044	1.27	Female	25	College Freshman	Introduction to psychology	Columbus State Community College
296243	online	6	-1.39	-1.518	1.295	1	1.438	-0.348	Male	20	College Sophomore	Introduction to Psychology	Other
296245	online	5	2.027	-1.73	0.456	-1.044	0.898	1.035	Female	31	College Sophomore	Psychology 100	Columbus State Community College
296254	online	8	1.295	2.652	-1.39	-0.562	-3	1.482	Female	23	College Freshman	Introduction to psychology	Columbus State Community College
296258	online	7	-2.544	-0.965	0.027	-3.102	-1.044	1.27	Female	26	College Freshman	Introduction to Psychology	Columbus State Community College
296267	online	2	0.438	0.295	1	0.482	-0.348	0.61	Female	38	College Sophomore	psychology	Columbus State Community College
296276	online	4	-2	-1.39	-0.562	1.652	0.482	-0.705	Male	21	College Sophomore	intro to psychology	Columbus State Community College
296278	online	5	-1.973	-1.73	-0.544	0.956	-2.102	0.035	Female	20	College Sophomore	Introduction to Psychology	Columbus State Community College
296288	online	7	1.456	0.035	1.027	1.898	0.956	3.27	Male	19	College Freshman	Introduction to Psychology	Columbus State Community College
296301	online	3	-0.044	1.027	-2.102	1.035	0.27	-1.544	Female	22	College Senior	Psychology 100	Columbus State Community College
296304	online	8	1.295	-1.348	-3.39	1.438	1	1.482	Female	20	College Sophomore	introduction to psychology	Columbus State Community College
296307	online	1	-0.102	-2.544	-3.044	1.27	-1.965	-2.973	Female	20	College Sophomore	Introduction to Psychology	Columbus State Community College
296312	online	6	-0.39	-2.518	-2.705	-3	0.438	-1.348	Female	19	College Sophomore	Psychology	Columbus State Community College
296319	online	4	-3	-3.39	-2.562	-2.348	0.482	1.295	Female	23	College Freshman	Psychology 100	Columbus State Community College
296327	online	5	-0.973	-0.73	-1.544	-3.044	0.898	2.035	Male	26	College Freshman	psy100	Columbus State Community College
296331	online	1	-0.102	1.456	-0.044	1.27	-1.965	0.027	Female	27	College Freshman	intro to psychology	Columbus State Community College
296337	online	7	0.456	0.035	1.027	0.898	0.956	-0.73	Male	28	College Freshman	Introduction to Psychology	Columbus State Community College
296374	online	7	-1.544	0.035	-0.973	-1.102	-0.044	3.27	Female	20	College Freshman	Introduction to Psychology	Columbus State Community College
296381	online	2	-1.562	-1.705	-2	-2.518	0.652	-0.39	Male	40	College Sophomore	Introduction to Psychology	Columbus State Community College
296398	online	8	0.295	-0.348	1.61	-1.562	1	0.482	Male	20	College Sophomore	Introduction to Psychology	Columbus State Community College
296443	online	6	-2.39	-1.518	1.295	-1	1.438	1.652	Female	19	College Sophomore	Introduction to Psychology	Other
296475	online	7	-1.544	-0.965	-0.973	-2.102	-0.044	0.27	Female	36	College Senior	Psychology 100	Columbus State Community College
296500	online	2	-1.562	-1.705	-2	1.482	1.652	0.61	Female	35	College Freshman	Psychology	Columbus State Community College
296507	online	5	1.027	-1.73	-1.544	-2.044	0.898	-0.965	Male	28	College Sophomore	Introduction to Psychology	Columbus State Community College
296511	online	8	-1.705	-1.348	-0.39	-0.562	-1	-0.518	Female	20	College Junior	Introduction to Psychology	Columbus State Community College
296531	online	5	2.027	-1.73	-2.544	-1.044	1.898	0.035	Female	35	Bachelor's Degree (or more) Completed	Introduction to Psychology	Columbus State Community College
296533	online	8	-0.705	-2.348	-1.39	-0.562	0	-2.518	Female	53	Bachelor's Degree (or more) Completed	Psychology	Columbus State Community College
296585	online	7	1.456	-0.965	2.027	-0.102	-1.044	-1.73	Female	20	College Sophomore	Intro to Psychology 100	Columbus State Community College
296594	online	5	-0.973	2.27	2.456	-1.044	-2.102	-1.965	Female	25	College Freshman	phychology	Columbus State Community College
296617	online	4	-2	-0.39	-0.562	-1.348	-0.518	-0.705	Female	22	College Senior	Introduction to Psychology	Columbus State Community College
296645	online	8	-1.705	-1.348	-0.39	0.438	1	1.482	Female	33	College Senior	Introduction to Psycology	Columbus State Community College
296657	online	8	0.295	2.652	1.61	0.438	2	-0.518	Male	19	College Sophomore	PSY 100 WEB	Columbus State Community College
296661	online	4	-1	0.61	-0.562	-0.348	1.482	1.295	Female	20	College Junior	Introduction to Psychology	Other
296662	online	5	0.027	-0.73	-0.544	-1.044	-1.102	-0.965	Male	19	College Sophomore	Introduction to Pyschology	Columbus State Community College
296696	online	6	-2.39	0.482	-1.705	-2	1.438	-1.348	Female	33	College Sophomore	Introduction to Psychology	Columbus State Community College
296750	online	7	-0.544	-1.965	-0.973	-1.102	-2.044	1.27	Female	24	College Freshman	intro to psychology	Columbus State Community College
296753	online	2	1.438	-1.705	-2	2.482	0.652	0.61	Female	30	College Sophomore	introduction to psychology	Columbus State Community College
296768	online	3	-1.044	-1.973	-0.102	-1.965	-1.73	-2.544	Female	23	College Sophomore	Intro. to Psychology	Columbus State Community College
296789	online	3	-1.044	2.027	0.898	-2.965	-0.73	1.456	Female	37	College Sophomore	Intro to Psychology 100	Columbus State Community College
296794	online	3	-1.044	-2.973	-2.102	-1.965	-1.73	-1.544	Female	29	College Freshman	Introduction to Psychology	Columbus State Community College
296797	online	5	1.027	0.27	-1.544	-2.044	-1.102	-0.965	Female	23	College Junior	Introduction to Psychology	Columbus State Community College
296835	online	1	-0.102	-0.544	-0.044	-0.73	1.035	0.027	Female	46	College Freshman	Introdcution to Psychology	Columbus State Community College
296841	online	4	1	-1.39	-1.562	-1.348	-1.518	-1.705	Female	39	College Junior	Introduction to Psychology	Columbus State Community College
296848	online	5	1.027	2.27	1.456	0.956	0.898	0.035	Male	25	Bachelor's Degree (or more) Completed		Columbus State Community College
296849	online	2	-0.562	-1.705	-3	-0.518	-1.348	-2.39	Female	42	College Junior	intro to psychology	Columbus State Community College
296859	online	4	-1	-0.39	-1.562	-1.348	-1.518	0.295	Male	23	College Junior	Psychology	Columbus State Community College
296865	online	5	2.027	-0.73	-1.544	-2.044	-0.102	-0.965	Female	20	College Sophomore	Introduction to psychology WEB 16332	Columbus State Community College
296880	online	2	0.438	0.295	-3	-1.518	-2.348	-2.39	Female	31	College Sophomore	intro to psychology	Columbus State Community College
296897	online	1	-1.102	0.456	-0.044	2.27	1.035	1.027	Female	20	College Sophomore		Columbus State Community College
296982	online	7	-0.544	-0.965	1.027	0.898	0.956	-1.73	Female	19	College Sophomore	Introduction to Psychology	Columbus State Community College
297007	online	6	-2.39	-1.518	-2.705	-2	0.438	-1.348	Female	21	College Sophomore	Introduction to Psychology	Columbus State Community College
297030	online	5	2.027	-1.73	-0.544	-1.044	-1.102	2.035	Male	28	College Freshman		Columbus State Community College
297119	online	2	1.438	1.295	-2	-1.518	-1.348	0.61	Female	42	College Sophomore	Introduction to Psychololgy	Columbus State Community College
297133	online	8	-2.705	0.652	-1.39	-2.562	1	-0.518	Female	21	College Senior	Into to Psychology	Columbus State Community College
297136	online	8	-1.705	-0.348	-1.39	1.438	1	0.482	Female	19	College Sophomore	Introduction to Psychology	Columbus State Community College
297139	online	7	-1.544	-2.965	0.027	-2.102	-1.044	0.27	Female	26	College Sophomore	psy 100	Columbus State Community College
297166	online	2	-1.562	-0.705	1	0.482	-2.348	-3.39	Female	43	College Freshman	Indroduction to Psychology	Columbus State Community College
297174	online	2	-1.562	-1.705	1	2.482	-1.348	-0.39	Male	20	College Junior	Intro to Psychology	Other
297187	online	5	1.027	-0.73	0.456	-1.044	0.898	0.035	Female	37	College Sophomore	Introduction to Psychology	Columbus State Community College
297237	online	6	-0.39	-1.518	-1.705	-3	-0.562	0.652	Female	23	College Freshman	Psychology	Columbus State Community College
297245	online	3	-2.044	-1.973	0.898	0.035	1.27	1.456	Female	20	College Junior	Intro to Psychology 101 Web	Columbus State Community College
297308	online	5	-2.973	-0.73	0.456	-1.044	-3.102	-0.965	Female	21	College Freshman	Psychology 100	Columbus State Community College
297320	online	3	-0.044	2.027	-1.102	-0.965	-0.73	0.456	Male	28	College Senior	Introduction to Psychology	Columbus State Community College
297361	online	8	1.295	1.652	-1.39	1.438	0	1.482	Male	19	College Sophomore	Psychology 100	Other
297369	online	7	-0.544	0.035	-0.973	-1.102	-0.044	1.27	Female	22	College Freshman	psychology 100	Columbus State Community College
297382	online	6	-0.39	-1.518	-0.705	0	-0.562	-0.348	Female	22	College Freshman	Intro to psycology	Columbus State Community College
297465	online	4	-1	-0.39	0.438	-1.348	1.482	1.295	Female	28	College Sophomore	Intro to Psychology	Columbus State Community College
297469	online	5	0.027	-0.73	-0.544	-1.044	-0.102	-0.965	Female	49	College Junior	Intro to Psychology	Columbus State Community College
297486	online	1	-0.102	-0.544	-0.044	-1.73	-1.965	0.027	Female	34	College Junior	Intro to Psychology	Columbus State Community College
297496	online	3	-1.044	0.027	0.898	0.035	2.27	-2.544	Female	28	College Sophomore	PSY 100	Columbus State Community College
297498	online	2	-0.562	-0.705	-2	-0.518	0.652	-0.39	Female	20	College Junior	Introduction to Psychology	Columbus State Community College
297506	online	6	-2.39	1.482	-0.705	-1	-1.562	1.652	Female	28	College Junior	Introduction to Psychology	Columbus State Community College
297518	online	5	1.027	-0.73	-1.544	-2.044	0.898	-0.965	Female	42	College Freshman	Introduction to Psychology (Psychology 100)	Columbus State Community College
297535	online	8	2.295	2.652	-3.39	2.438	2	1.482	Female	29	College Sophomore	Introduction to Psychology	Columbus State Community College
297539	online	3	-3.044	1.027	-1.102	1.035	-0.73	-1.544	Female	19	College Freshman	intro to psychology	Columbus State Community College
297544	online	7	-0.544	-1.965	0.027	-3.102	-1.044	-0.73	Female	33	College Freshman	Introduction to Psychology	Columbus State Community College
297625	online	1	0.898	2.456	0.956	1.27	-1.965	2.027	Female	21	College Freshman	Psychology 100	Columbus State Community College
297631	online	4	-1	-0.39	-1.562	-2.348	-2.518	-2.705	Female	20	College Freshman	Introduction to Psychology	Columbus State Community College
297648	online	8	0.295	1.652	-2.39	1.438	-1	-0.518	Male	19	College Sophomore	Introduction to Psychology	Columbus State Community College
297671	online	4	-2	0.61	2.438	1.652	1.482	-1.705	Female	23	College Senior	Introduction to Psychology	Columbus State Community College
297689	online	4	-3	0.61	0.438	-1.348	-0.518	1.295	Female	32	College Freshman	Psychology 100	Columbus State Community College
297728	online	3	-0.044	-0.973	0.898	0.035	1.27	-1.544	Female	29	College Sophomore	Psychology 100- Into to Psychology	Columbus State Community College
297807	online	7	-1.544	0.035	0.027	0.898	-0.044	-1.73	Female	34	College Freshman	Psychology 100	Columbus State Community College
297822	online	1	0.898	-1.544	-2.044	-0.73	-1.965	-0.973	Female	24	College Senior	Intro to Psychology	Columbus State Community College
297827	online	1	-2.102	-1.544	-2.044	2.27	0.035	-1.973	Female	29	Bachelor's Degree (or more) Completed	Intro to Psych	Columbus State Community College
298120	online	6	-2.39	-0.518	-1.705	-1	-0.562	0.652	Female	23	College Freshman	Introduction to Psychology	Columbus State Community College
298216	online	3	0.956	-1.973	-2.102	-0.965	0.27	-0.544	Female	28	College Freshman	psychology	Columbus State Community College
298243	online	5	2.027	3.27	-2.544	-0.044	-2.102	-2.965	Male	28	College Senior	Introduction to Psychology	Columbus State Community College
298244	online	1	-1.102	-1.544	-0.044	-0.73	1.035	-0.973	Male	23	College Senior	Introduction to Psychology	Columbus State Community College
298250	online	6	-1.39	0.482	0.295	0	1.438	0.652	Female	18	College Sophomore	intro to psych	Columbus State Community College
298272	online	1	-1.102	-0.544	-1.044	-0.73	-2.965	-1.973	Female	34	College Freshman	Introduction to Psychology, PSY 100	Columbus State Community College
298282	online	1	-1.102	-0.544	-2.044	-1.73	-2.965	1.027	Female	36	College Freshman	Psychology 100	Columbus State Community College
298297	online	4	-1	-0.39	-1.562	-0.348	-1.518	-2.705	Male	24	College Freshman	Introduction to psychology	Columbus State Community College
298323	online	6	0.61	-1.518	-1.705	-2	-0.562	-0.348	Female	25	College Freshman	Introduction to Psychology	Columbus State Community College
298389	online	6	1.61	-0.518	-2.705	2	-2.562	-0.348	Female	55	College Freshman	Introduction to Psychology	Columbus State Community College
298395	online	4	-2	0.61	-1.562	-2.348	-0.518	0.295	Female	33	College Freshman	Intro to Psychology	Columbus State Community College
298439	online	4	-2	-0.39	-2.562	-2.348	1.482	1.295	Female	20	College Sophomore	Psychology 100 (Introduction to Psychology)	Columbus State Community College
298520	online	4	-3	-1.39	-1.562	-0.348	-1.518	0.295	Female	23	College Freshman	Introduction to Psychology	Columbus State Community College
298530	online	1	-2.102	-2.544	-3.044	0.27	-0.965	-1.973	Female	20	College Sophomore	Introduction to Psychology	Columbus State Community College
298531	online	4	-3	-1.39	-1.562	-1.348	-0.518	-1.705	Male	40	College Senior	Introduction to Psychology	Columbus State Community College
298552	online	1	0.898	-1.544	-0.044	3.27	0.035	-0.973	Male	22	College Junior	Introduction to Psychology	Columbus State Community College
298606	online	5	-1.973	-1.73	-0.544	-2.044	-0.102	-1.965	Female	41	College Sophomore	Intro to Psych	Columbus State Community College
298625	online	7	-0.544	-2.965	-2.973	-1.102	-0.044	0.27	Male	22	College Junior	Introduction to Psychology	Columbus State Community College
298633	online	6	-2.39	-0.518	-0.705	-3	2.438	0.652	Female	51	College Junior	Introduction to Psychology	Columbus State Community College
298637	online	6	-0.39	-0.518	-1.705	-3	0.438	-0.348	Male	24	College Sophomore	Intro to Psychology	Columbus State Community College
298645	online	8	0.295	-0.348	1.61	0.438	1	1.482	Female	27	College Junior	Intro ti Psychology	Columbus State Community College
298653	online	8	1.295	-1.348	-0.39	-0.562	1	-1.518	Female	27	College Junior		Columbus State Community College
298659	online	8	-1.705	0.652	0.61	-1.562	0	-1.518	Female	19	College Sophomore	Intro to Psychology	Columbus State Community College
298669	online	6	0.61	-1.518	1.295	-1	1.438	-0.348	Male	30	College Sophomore	Introduction to psychology	Columbus State Community College
298871	online	4	0	0.61	-1.562	-2.348	2.482	0.295	Male	48	College Freshman	Introduction to psychology	Columbus State Community College
298888	online	4	0	0.61	-1.562	-1.348	0.482	-0.705	Female	30	College Freshman	Introduction to Psychology	Columbus State Community College
298976	online	8	-0.705	-1.348	0.61	0.438	-1	-1.518	Female	25	College Sophomore	Psychology	Columbus State Community College
299056	online	2	0.438	-0.705	-2	-1.518	0.652	-1.39	Female	37	College Sophomore	psychology	Columbus State Community College
299170	online	4	-1	1.61	-2.562	-2.348	-0.518	-0.705	Male	35	College Freshman	Introduction to Psychology	Columbus State Community College
299210	online	6	0.61	-0.518	-0.705	-2	-0.562	-0.348	Female	37	College Sophomore	Intro to Psychology	Columbus State Community College
299249	online	5	2.027	0.27	2.456	-2.044	0.898	0.035	Male	26	College Junior		Columbus State Community College
299375	online	1	-2.102	-1.544	-2.044	1.27	1.035	-0.973	Female	32	College Freshman	pschology 100	Columbus State Community College
299797	online	5	-1.973	-1.73	-1.544	-2.044	-2.102	1.035	Female	25	Bachelor's Degree (or more) Completed	Psyc 100	Columbus State Community College
299963	online	8	0.295	0.652	0.61	-1.562	2	-0.518	Female	26	College Freshman	Psych 100	Columbus State Community College
299980	online	8	2.295	-2.348	1.61	-2.562	2	-1.518	Female	25	College Freshman	Intro to Psychology	Columbus State Community College
299983	online	3	-2.044	-2.973	-3.102	2.035	1.27	-1.544	Female	20	College Junior	Intro to Psychology	Columbus State Community College
300042	online	8	-0.705	-1.348	-2.39	-1.562	-2	-2.518	Female	40	College Sophomore	Psychology 100	Columbus State Community College
300764	online	8	1.295	-1.348	-0.39	-0.562	-1	1.482	Female	32	College Freshman	Psychology 100	Columbus State Community College
300969	online	3	-1.044	-1.973	-1.102	-0.965	1.27	0.456	Female	25	College Sophomore	intoduction to psycholocgy	Columbus State Community College
300980	online	6	0.61	-0.518	-0.705	1	1.438	0.652	Female	19	College Freshman	Psychology	Columbus State Community College
301004	online	3	-2.044	2.027	0.898	-0.965	1.27	1.456	Female	20	College Sophomore	Introduction to Psychology	Columbus State Community College
301359	online	7	0.456	-0.965	-0.973	-0.102	0.956	1.27	Male	20	College Senior	INTRODUCTION TO PSYCHOLOGY	Columbus State Community College
301487	online	8	-2.705	-2.348	-3.39	2.438	0	-0.518	Male	32	College Sophomore	Introduction to Psychology (PSY 100)	Columbus State Community College
301534	online	6	-3.39	-1.518	-0.705	0	1.438	-1.348	Female	39	College Sophomore	psy 100	Columbus State Community College
301543	online	7	-0.544	-1.965	-2.973	-1.102	-0.044	1.27	Female	37	College Freshman	Introduction to Psychology	Columbus State Community College
301795	online	8	-1.705	-0.348	-0.39	0.438	-3	-1.518	Male	27	College Freshman	Introduction to Psychology	Columbus State Community College
302105	online	7	-1.544	-0.965	-0.973	-1.102	0.956	-1.73	Male	21	College Freshman	Distance Learning Introduction to Psychology	Columbus State Community College
302119	online	3	-3.044	-2.973	-2.102	-2.965	-0.73	-1.544	Female	19	College Junior	Introduction to Psychology	Columbus State Community College
302269	online	4	-1	-1.39	0.438	0.652	1.482	-0.705	Male	21	College Senior	intro to psyc	Columbus State Community College
302486	online	4	2	-0.39	0.438	0.652	0.482	0.295	Female	38	College Sophomore	Introduction to Psychology	Columbus State Community College
302536	online	8	-1.705	1.652	-0.39	1.438	-1	1.482	Male	22	College Senior	psychology	Columbus State Community College
302598	online	4	0	-0.39	-1.562	1.652	1.482	1.295	Female	32	College Senior	Psychology	Columbus State Community College
302608	online	3	-2.044	-2.973	0.898	0.035	2.27	-1.544	Male	37	College Junior	psychology 100	Columbus State Community College
302656	online	8	2.295	-1.348	0.61	-1.562	2	0.482	Female	31	College Senior	Psychology	Columbus State Community College
302705	online	5	-1.973	-0.73	-2.544	-1.044	-1.102	0.035	Male	27	Bachelor's Degree (or more) Completed	Introduction to Psychology	Columbus State Community College
302754	online	1	-3.102	-2.544	-3.044	-0.73	-1.965	-2.973	Male	27	College Sophomore	intro to psychology	Columbus State Community College
302784	online	2	-1.562	-1.705	0	-1.518	-0.348	0.61	Female	26	College Sophomore	PSY 100, intro into psychology	Columbus State Community College
302794	online	8	-2.705	-2.348	1.61	-2.562	2	0.482	Female	21	College Freshman	Introduction to psychology	Columbus State Community College
302834	online	3	0.956	-2.973	-0.102	-1.965	0.27	-1.544	Female	19	College Sophomore	Intro to Psychology	Other
302899	online	8	-1.705	0.652	0.61	-0.562	-1	0.482	Female	29	College Sophomore	Intro to Psychology	Columbus State Community College
302900	online	8	0.295	-1.348	-1.39	1.438	1	1.482	Male	22	College Junior	Introduction to psychology	Columbus State Community College
302942	online	6	0.61	-1.518	-0.705	-2	-0.562	-2.348	Female	24	College Sophomore	Psychology 100	Columbus State Community College
303233	online	1	1.898	2.456	-0.044	-1.73	2.035	0.027	Male	29	College Sophomore	intro to psychology	Columbus State Community College
