# Supplementary material for: The effect of ad hominem attacks on the evaluation of claims promoted by scientists
Source: PLoS One. 2018 Jan 30;13(1):e0192025. doi: 10.1371/journal.pone.0192025 (PMC5790247; doi:10.1371/journal.pone.0192025)
Supplement: S4 File — (CSV) [file pone.0192025.s006.csv]

	this indicates the questionnaire variant (there were 8 of them)	attitude difference scores are in this column and next 5
Participant#	questionnaire variant	empirical	relevant misconduct	past misconduct	conflict of interest	education	sloppy	age	gender	education	state	sci_knowledge	income	race	marital status
291618	7	-1.612	-0.619	-2.122	-2.051	1	-1.663	53	Male	Some college	florida	Somewhat knowledgeable	$10.000 - $19.999	Non-Hispanic White	Never been married
291620	3	0	-1.122	-0.051	-0.619	-1.663	0.388	44	Male	Master’s degree	CA	Moderately knowledgeable	Less than $10.000	Non-Hispanic White	Never been married
291622	4	-1.98	-1.356	1	-1.099	-0.347	-0.545	36	Male	Bachelor’s degree	colorado	Somewhat knowledgeable	$60.000 - $69.999	Non-Hispanic White	Married
291626	1	-0.051	1.388	-2	-0.663	0.381	-2.122	53	Male	Some graduate school	Ohio	Moderately knowledgeable	$50.000 - $59.999	Non-Hispanic White	Married
291640	3	0	-2.122	-2.051	1.381	-0.663	-0.612	50	Male	Some college	sc	Somewhat knowledgeable	$20.000 - $29.999	Non-Hispanic White	Never been married
291646	5	-0.122	-1.663	-2.612	-2	-0.051	-1.619	69	Male	Some college	South Dakota	Somewhat knowledgeable	$50.000 - $59.999	Non-Hispanic White	Married
291652	6	-1.356	-1.347	-1.545	-0.98	-1	-0.099	40	Female	Some college	Arizona	Not very knowledgeable	$30.000 - $39.999	Non-Hispanic White	Married
291663	7	0.388	-1.619	-2.122	-2.051	0	-0.663		Female	Some college		Somewhat knowledgeable	$40.000 - $49.999	Non-Hispanic White	Divorced
291665	8	-1.545	-0.099	-2.356	-3	2.02	-0.347	27	Female	Some college	ohio	Somewhat knowledgeable	$30.000 - $39.999	Non-Hispanic White	Married
291756	2	1	1.455	1.02	0.653	1.901	-0.356	41	Male	Some college	NC	Very knowledgeable	$10.000 - $19.999	Non-Hispanic White	Married	291756
291758	6	-0.356	0.653	0.455	0.02	1	0.901	64	Female	Some college	Maryland	Somewhat knowledgeable	$40.000 - $49.999	Non-Hispanic White	Married
291761	1	-2.051	-2.612	-3	-1.663	1.381	-0.122	29	Female	Some college	texas	Not very knowledgeable	$80.000 - $89.999	Non-Hispanic White	Married
291764	8	-0.545	-0.099	-1.356	1	0.02	0.653	31	Female	Master’s degree	Wisconsin	Somewhat knowledgeable	Less than $10.000	Non-Hispanic White	Never been married
291832	4	-1.98	1.644	-2	-0.099	2.653	1.455	35	Male	Some college	california	Somewhat knowledgeable	$60.000 - $69.999	Non-Hispanic White	Married
291842	6	0.644	-2.347	-2.545	2.02	-1	-2.099	79	Female	Master’s degree	sc	Somewhat knowledgeable	$10.000 - $19.999	Non-Hispanic White	Widowed
291846	7	-0.612	-0.619	-0.122	-0.051	-1	1.337	31	Female	High school diploma or equivalent	wisconsin	Somewhat knowledgeable	$10.000 - $19.999	Non-Hispanic White	A member of an unmarried couple
291848	8	1.455	-0.099	-1.356	0	1.02	0.653	54	Male	High school diploma or equivalent	texas	Somewhat knowledgeable	$40.000 - $49.999	Non-Hispanic White	Married
292001	5	-2.122	3.337	0.388	-2	0.949	1.381	29	Male	Bachelor’s degree	NC	Moderately knowledgeable	$100.000 or more	Non-Hispanic White	Married
292008	8	-1.545	-1.099	-2.356	1	-0.98	-0.347	53	Male	Master’s degree	Pennsylvania	Very knowledgeable	Less than $10.000	Non-Hispanic White	Divorced
292009	2	-3	-2.545	-2.98	-2.347	-2.099	0.644	46	Male	Some college	CA	Moderately knowledgeable	$100.000 or more	Non-Hispanic White	Separated	292009
292010	1	-2.051	-2.612	-2	-1.663	-2.619	-3.122	67	Male	Some college	nj	Somewhat knowledgeable	$80.000 - $89.999	Non-Hispanic White	Married
292011	2	0	0.455	0.02	0.653	-0.099	-0.356	30	Female	Some college	MS	Not very knowledgeable	$40.000 - $49.999	Non-Hispanic White	Divorced
292014	3	2	-3.122	1.949	-2.619	-1.663	2.388	61	Male	Some college	la	Somewhat knowledgeable	$50.000 - $59.999	Non-Hispanic White	Married
292016	4	0.02	0.644	-2	-1.099	-0.347	1.455	43	Female	Bachelor’s degree	north carolina	Moderately knowledgeable	$50.000 - $59.999	Non-Hispanic White	Divorced
292021	6	-1.356	-1.347	0.455	-1.98	1	-1.099	70	Female	Some college	Arizona	Moderately knowledgeable	$40.000 - $49.999	Non-Hispanic White	Divorced
292025	7	1.388	-0.619	-1.122	-3.051	0	1.337	33	Female	Master’s degree	CA	Somewhat knowledgeable	$60.000 - $69.999	Hispanic or Latino	Never been married
292028	8	0.455	-2.099	1.644	-3	2.02	2.653	62	Female	Some college	CA	Not very knowledgeable	$40.000 - $49.999	Black or African American	Married
292058	7	-2.612	-0.619	-3.122	-2.051	-3	3.337	36	Female	Bachelor’s degree	NJ	Somewhat knowledgeable	$90.000 - $99.999	Non-Hispanic White	Married
292059	3	2	1.878	-0.051	0.381	-1.663	-2.612	67	Female	Some college	Indiana	Not very knowledgeable	$20.000 - $29.999	Hispanic or Latino	Divorced
292066	6	1.644	0.653	2.455	1.02	1	1.901	44	Male	Some graduate school	CALIFORNIA	Somewhat knowledgeable	$60.000 - $69.999	Black or African American	Married
292069	1	0.949	0.388	1	2.337	0.381	-0.122	42	Male	Bachelor’s degree	married	Moderately knowledgeable	$100.000 or more	Non-Hispanic White	Married
292078	2	-1	-2.545	-0.98	-1.347	0.901	-1.356	32	Female	Master’s degree	Connnecticut	Moderately knowledgeable	$100.000 or more	Hispanic or Latino	Married
292082	3	2	-0.122	-3.051	-1.619	-1.663	-2.612	70	Male	Bachelor’s degree		Not very knowledgeable	$10.000 - $19.999	Black or African American	Separated
292087	4	1.02	-2.356	2	-2.099	0.653	-1.545	72	Male	Some college	Ca	Moderately knowledgeable	$30.000 - $39.999	Non-Hispanic White	Married
292089	5	-0.122	1.337	1.388	0	-0.051	-0.619	55	Female	Some college	NC	Not very knowledgeable	$40.000 - $49.999	Non-Hispanic White	A member of an unmarried couple
292098	7	-1.612	-1.619	-2.122	-2.051	0	1.337	52	Male	Some college	Indiana	Somewhat knowledgeable	$40.000 - $49.999	Non-Hispanic White	Married
292130	5	0.878	-0.663	1.388	0	-2.051	0.381	35	Female	High school diploma or equivalent	ohio	Not very knowledgeable	Less than $10.000	Non-Hispanic White	Separated
292133	7	-1.612	1.381	-2.122	-1.051	0	1.337	68	Male	Bachelor’s degree	KS	Somewhat knowledgeable	$20.000 - $29.999	Non-Hispanic White	Divorced
292135	3	1	-0.122	-0.051	-0.619	0.337	-0.612	32	Male	Some graduate school	Ut	Somewhat knowledgeable	$30.000 - $39.999	Non-Hispanic White	Never been married
292141	2	-2	-1.545	-1.98	-0.347	-0.099	0.644	56	Male	Some college	georgia	Not very knowledgeable	Less than $10.000	Black or African American	Divorced	292141
292146	1	-2.051	-1.612	-2	-0.663	-0.619	-2.122	27	Male	Bachelor’s degree	Montana	Somewhat knowledgeable	$70.000 - $79.999	Non-Hispanic White	Married
292149	1	-0.051	0.388	-2	2.337	0.381	0.878	27	Male	Some college	PA	Somewhat knowledgeable	$50.000 - $59.999	Non-Hispanic White	Married
292175	3	0	-0.122	-0.051	1.381	-1.663	0.388	59	Female	Some college	IL	Not very knowledgeable	$60.000 - $69.999	Non-Hispanic White	Divorced
292177	4	1.02	-0.356	-1	-0.099	2.653	1.455	31	Female	Some college	Texas	Somewhat knowledgeable	$30.000 - $39.999	Black or African American	Never been married
292273	4	-1.98	-1.356	0	-1.099	-0.347	0.455	53	Male	Bachelor’s degree	Nevada	Somewhat knowledgeable	$100.000 or more	Non-Hispanic White	A member of an unmarried couple
292291	6	0.644	-1.347	-1.545	-1.98	1	1.901	39	Male	Bachelor’s degree	florida	Somewhat knowledgeable	$50.000 - $59.999	Black or African American	Married
292297	1	0.949	0.388	0	0.337	-0.619	-0.122	67	Male	Master’s degree	CA	Moderately knowledgeable	$70.000 - $79.999	Non-Hispanic White	Married
292301	8	-0.545	-0.099	-1.356	-1	-0.98	-0.347	50	Female	Some college	PA	Not very knowledgeable	Less than $10.000	Black or African American	Separated
292312	1	-0.051	0.388	-1	-0.663	0.381	0.878	69	Male	Master’s degree	CA	Somewhat knowledgeable	$30.000 - $39.999	Non-Hispanic White	Married
292402	5	-0.122	-0.663	-2.612	-3	-2.051	-1.619	68	Male	Some college	georgia	Somewhat knowledgeable	$100.000 or more	Non-Hispanic White	Married
292410	6	-2.356	-0.347	-0.545	-0.98	0	0.901	28	Male	Some college	Illinois	Somewhat knowledgeable	$20.000 - $29.999	Non-Hispanic White	Never been married
292417	7	2.388	0.381	-3.122	1.949	2	-1.663	83	Male	Some college	Wi	Somewhat knowledgeable	$30.000 - $39.999	Non-Hispanic White	Married
292419	8	1.455	-2.099	-0.356	-3	-0.98	0.653	50	Male	Some college	new jersey	Moderately knowledgeable	$10.000 - $19.999	Non-Hispanic White	Divorced
292456	5	0.878	-0.663	-0.612	-1	-0.051	-0.619	42	Female	Master’s degree	MI	Somewhat knowledgeable	$80.000 - $89.999	Non-Hispanic White	Never been married
292463	3	2	-1.122	-3.051	-2.619	1.337	2.388	67	Female	Some college	california	Somewhat knowledgeable	$20.000 - $29.999	Black or African American	Married
292465	2	-3	2.455	-2.98	-2.347	-0.099	-3.356	58	Male	Some college	pa	Moderately knowledgeable	$20.000 - $29.999	Non-Hispanic White	Married	292465
292471	1	-2.051	-2.612	-1	-1.663	-0.619	-1.122	33	Female	Some college	Oregon	Somewhat knowledgeable	$40.000 - $49.999	Non-Hispanic White	Married
292480	3	-2	-2.122	-3.051	-1.619	1.337	0.388	40	Female	Some college	Indiana	Somewhat knowledgeable	$80.000 - $89.999	Non-Hispanic White	Married
292485	4	-0.98	-1.356	-1	-0.099	-0.347	0.455	57	Female	Bachelor’s degree	wi	Somewhat knowledgeable	$20.000 - $29.999	Non-Hispanic White	Divorced
292487	5	1.878	-1.663	-1.612	1	-2.051	-0.619	55	Female	Master’s degree	PA	Somewhat knowledgeable	$100.000 or more	Non-Hispanic White	Married
292492	6	-1.356	-1.347	-1.545	0.02	-1	0.901	27	Male	Some college	oklahoma	Somewhat knowledgeable	$40.000 - $49.999	Hispanic or Latino	Married
292499	7	-0.612	-1.619	-1.122	-2.051	0	0.337	56	Male	Some college	michigan	Somewhat knowledgeable	$70.000 - $79.999	Non-Hispanic White	Married
292539	5	-2.122	0.337	1.388	-1	0.949	2.381	47	Female	Some college	Georgia	Somewhat knowledgeable	$60.000 - $69.999	Non-Hispanic White	Divorced
292547	6	0.644	-0.347	1.455	-0.98	-1	1.901	51	Female	Bachelor’s degree	Kentucky	Moderately knowledgeable	$90.000 - $99.999	Non-Hispanic White	Married
292548	1	0.949	0.388	0	-0.663	0.381	0.878	56	Male	Master’s degree	California	Moderately knowledgeable	$100.000 or more	Non-Hispanic White	Divorced
292551	1	-1.051	-1.612	-3	-1.663	-0.619	-2.122	67	Male	Some college	pa	Somewhat knowledgeable	$20.000 - $29.999	Non-Hispanic White	Married
292552	2	0	0.455	-0.98	-1.347	1.901	-0.356	47	Female	Bachelor’s degree	California	Somewhat knowledgeable	$60.000 - $69.999	Non-Hispanic White	Married
292555	3	1	-1.122	-0.051	0.381	1.337	-0.612	76	Female	High school diploma or equivalent	ohio	Not very knowledgeable	$70.000 - $79.999	Non-Hispanic White	Married
292561	5	-0.122	-1.663	0.388	-3	0.949	0.381	48	Female	Some college	Texas	Somewhat knowledgeable	$30.000 - $39.999	Hispanic or Latino	Married
292567	7	-1.612	-0.619	-0.122	-2.051	1	-1.663	30	Male	Bachelor’s degree	Florida	Somewhat knowledgeable	$100.000 or more	Non-Hispanic White	Married
292569	8	-2.545	0.901	0.644	0	1.02	1.653	52	Female	Some college	Ohio	Not very knowledgeable	$50.000 - $59.999	Non-Hispanic White	Married
292593	5	-1.122	-1.663	-2.612	-2	0.949	0.381	45	Male	High school diploma or equivalent	FL	Not very knowledgeable	$30.000 - $39.999	Non-Hispanic White	Divorced
292611	7	-0.612	-1.619	-2.122	-1.051	0	1.337	60	Male	Some college	Wisconsin	Very knowledgeable	$60.000 - $69.999	Non-Hispanic White	Married
292613	4	-2.98	-2.356	1	-1.099	0.653	1.455	70	Male	Some college	Washington	Somewhat knowledgeable	$50.000 - $59.999	Black or African American	Married
292614	2	1	-1.545	-0.98	-1.347	-2.099	1.644	25	Male	Bachelor’s degree	Michigan	Moderately knowledgeable	$60.000 - $69.999	Non-Hispanic White	Never been married	292614
292615	6	-3.356	-2.347	-2.545	-2.98	0	-0.099	42	Male	Some graduate school	Pennsylvania	Somewhat knowledgeable	$40.000 - $49.999	Hispanic or Latino	Separated
292617	1	-0.051	-2.612	-2	1.337	0.381	-2.122	56	Female	High school diploma or equivalent	Colorado	Somewhat knowledgeable	$40.000 - $49.999	Non-Hispanic White	Married
292618	8	0.455	-0.099	-1.356	0	-0.98	-0.347	30	Female	High school diploma or equivalent	mo	Somewhat knowledgeable	$50.000 - $59.999	Non-Hispanic White	Married
292625	2	0	0.455	1.02	-0.347	-1.099	-1.356	36	Female	Some college
292629	3	0	-3.122	-2.051	-0.619	-0.663	-1.612	32	Female	Bachelor’s degree	Michigan	Somewhat knowledgeable	$80.000 - $89.999	Black or African American	Married
292631	4	-0.98	-0.356	-2	-1.099	2.653	0.455	33	Female	Doctoral degree	MS	Very knowledgeable	$100.000 or more	Non-Hispanic White	Married
292645	8	2.455	-0.099	-0.356	0	-1.98	1.653	64	Male	High school diploma or equivalent	Washington	Not very knowledgeable	$70.000 - $79.999	Black or African American	Married
292678	5	-3.122	-1.663	-2.612	2	1.949	-2.619	66	Female	High school diploma or equivalent	Tx	Not very knowledgeable	$30.000 - $39.999	Non-Hispanic White	Married
292685	7	-1.612	0.381	0.878	-0.051	0	0.337	36	Female	Some college	colorado	Somewhat knowledgeable	Less than $10.000	Non-Hispanic White	Married
292688	3	1	1.878	1.949	2.381	-1.663	-2.612	44	Female	Some graduate school	Texas	Not very knowledgeable	$40.000 - $49.999	Hispanic or Latino	Divorced
292689	4	-0.98	-0.356	-1	-0.099	0.653	2.455	34	Female	High school diploma or equivalent	California	Not very knowledgeable	$60.000 - $69.999	Black or African American	Never been married
292691	2	-2	-0.545	-0.98	-1.347	-0.099	-0.356	35	Female	Some college	Iowa	Somewhat knowledgeable	$30.000 - $39.999	Non-Hispanic White	Never been married	292691
292693	8	1.455	-0.099	-1.356	-3	-0.98	-0.347	33	Female	Some college	utah	Somewhat knowledgeable	$50.000 - $59.999	Non-Hispanic White	Married
292702	1	-1.051	-0.612	1	-1.663	-2.619	1.878	35	Male	Bachelor’s degree	texas	Moderately knowledgeable	$100.000 or more	Hispanic or Latino	Married
292712	2	-2	-0.545	-1.98	-0.347	-0.099	1.644	47	Female	Master’s degree	Kansas	Moderately knowledgeable	$70.000 - $79.999	Non-Hispanic White	Married
292726	4	1.02	-2.356	-1	-1.099	1.653	-2.545	31	Female	Some college	WI	Somewhat knowledgeable	$80.000 - $89.999	Non-Hispanic White	Married
292734	5	-2.122	-0.663	-0.612	-2	-0.051	0.381	37		High school diploma or equivalent	Ohio	Somewhat knowledgeable	$40.000 - $49.999	Non-Hispanic White	Married
292759	8	0.455	-1.099	0.644	1	1.02	-1.347	54	Female	Bachelor’s degree	Wisconsin	Not very knowledgeable	$50.000 - $59.999	Non-Hispanic White	Never been married
292993	5	-3.122	-1.663	-1.612	-3	-2.051	-1.619	35	Male	Some college	Ohio	Moderately knowledgeable	$30.000 - $39.999	Non-Hispanic White	A member of an unmarried couple
293015	7	-2.612	0.381	-1.122	-3.051	0	-1.663	37	Male	Some college	Co	Moderately knowledgeable	$90.000 - $99.999	Non-Hispanic White	Married
293047	3	0	-3.122	-3.051	-2.619	-1.663	-2.612	56	Female	Some college	California	Not very knowledgeable	$70.000 - $79.999	Non-Hispanic White	Married
293091	4	-1.98	-1.356	-1	-2.099	1.653	0.455	37	Male	Some college	wi	Moderately knowledgeable	$60.000 - $69.999	American Indian or Alaska Native	Never been married
293097	1	-1.051	-0.612	-3	1.337	1.381	-0.122	55	Male	Some college	Washington	Somewhat knowledgeable	$20.000 - $29.999	Non-Hispanic White	Married
293103	2	-2	-1.545	1.02	0.653	-1.099	1.644	27	Female	Master’s degree	california	Somewhat knowledgeable	$90.000 - $99.999	Non-Hispanic White	Never been married
293107	4	0.02	-0.356	0	0.901	-0.347	0.455	63	Male	Some college	tx.	Somewhat knowledgeable	$20.000 - $29.999	Non-Hispanic White	Married
293112	6	1.644	1.653	1.455	2.02	2	-1.099	45	Male	Bachelor’s degree	Oregon	Moderately knowledgeable	$70.000 - $79.999	Non-Hispanic White	Married
293114	7	0.388	-0.619	-1.122	-2.051	0	1.337	28	Female	Some graduate school	GA	Somewhat knowledgeable	$80.000 - $89.999	Non-Hispanic White	Never been married
293118	8	1.455	1.901	-1.356	1	0.02	0.653	28	Female	Master’s degree	Georgia	Somewhat knowledgeable	$90.000 - $99.999	Non-Hispanic White	Married
293148	7	-1.612	-2.619	-0.122	-2.051	-2	-1.663	57	Female	Some college	OREGON	Somewhat knowledgeable	$80.000 - $89.999	Non-Hispanic White	Married
293153	6	-3.356	-1.347	-0.545	-2.98	2	-0.099	66	Male	Bachelor’s degree	florida	Not very knowledgeable	$100.000 or more	Non-Hispanic White	Married
293154	2	0	0.455	-0.98	0.653	0.901	-1.356	48	Male	Some college	tennessee	Somewhat knowledgeable	$30.000 - $39.999	Non-Hispanic White	Married	293154
293156	8	-2.545	0.901	-1.356	0	1.02	0.653	65	Female	Some college		Not very knowledgeable	$10.000 - $19.999	Non-Hispanic White	Widowed
293157	1	0.949	-1.612	-1	-0.663	1.381	-0.122	43	Male	Master’s degree	Texas	Very knowledgeable	$70.000 - $79.999	Non-Hispanic White	Married
293168	3	0	0.878	-1.051	-1.619	-1.663	-2.612	62	Male	Some college	alabama	Moderately knowledgeable	$10.000 - $19.999	Hispanic or Latino	Divorced
293170	4	1.02	0.644	0	-1.099	1.653	-0.545	58	Male	Some college	Colorado	Not very knowledgeable	$40.000 - $49.999	Black or African American	Married
293172	5	-1.122	-0.663	-1.612	-2	0.949	-0.619	74	Male	Master’s degree	TX	Not very knowledgeable	$30.000 - $39.999	Non-Hispanic White	Married
293179	8	1.455	-1.099	0.644	1	0.02	-1.347	64	Male	Some graduate school	New Jersey	Moderately knowledgeable	$80.000 - $89.999	Non-Hispanic White	Married
293212	7	-2.612	-2.619	-3.122	-3.051	2	-1.663	65	Male	Bachelor’s degree	fl	Very knowledgeable	$90.000 - $99.999	Non-Hispanic White	Married
293215	4	-0.98	-0.356	-2	-0.099	-0.347	-2.545	52	Male	Master’s degree	Florida	Moderately knowledgeable	$100.000 or more	Non-Hispanic White	Married
293216	4	2.02	1.644	-3	-2.099	-0.347	-2.545	46	Male	High school diploma or equivalent	ny	Not very knowledgeable	$10.000 - $19.999	Hispanic or Latino	Never been married
293220	7	-1.612	-0.619	-1.122	-2.051	-1	1.337	50	Female	Some college	florida	Not very knowledgeable	$90.000 - $99.999	Non-Hispanic White	Married
293223	5	-0.122	-1.663	0.388	0	-0.051	0.381	62	Male	Some college	tn	Somewhat knowledgeable	$20.000 - $29.999	Non-Hispanic White	Divorced
293230	2	-2	1.455	1.02	-0.347	1.901	-0.356	58	Female	High school diploma or equivalent	kansas	Not very knowledgeable	Less than $10.000	Non-Hispanic White	Divorced
293233	1	-1.051	-2.612	-1	0.337	-0.619	-3.122	61	Male	Some college	Kentucky	Moderately knowledgeable	$90.000 - $99.999	Non-Hispanic White	Married
293236	6	-2.356	-0.347	2.455	2.02	1	-1.099	33	Female	High school diploma or equivalent	AK	Somewhat knowledgeable	$30.000 - $39.999	Non-Hispanic White	Never been married
293245	4	-1.98	-2.356	0	-1.099	2.653	-2.545	29	Female	Some college	connecticut	Moderately knowledgeable	$60.000 - $69.999	Non-Hispanic White	Married
293248	2	1	-1.545	-1.98	-0.347	-0.099	-0.356	27	Male	Some high school	Nebraska	Moderately knowledgeable	$60.000 - $69.999	Non-Hispanic White	Never been married	293248
293257	6	-3.356	-2.347	-1.545	-2.98	0	0.901	33	Male	Doctoral degree	Utah	Moderately knowledgeable	$90.000 - $99.999	Non-Hispanic White	Married
293258	1	-3.051	-0.612	-3	1.337	0.381	1.878	46	Male	Some college	California	Somewhat knowledgeable	$10.000 - $19.999	Black or African American	Divorced
293264	1	1.949	2.388	-1	3.337	1.381	1.878	41	Male	Bachelor’s degree	married	Moderately knowledgeable	$100.000 or more	Non-Hispanic White	Married
293267	2	0	-0.545	0.02	0.653	0.901	0.644	38	Male	Some college	Missouri	Moderately knowledgeable	$20.000 - $29.999	Non-Hispanic White	A member of an unmarried couple
293277	3	-1	0.878	-1.051	1.381	0.337	-1.612	47	Female	Bachelor’s degree	california	Somewhat knowledgeable	$70.000 - $79.999	Non-Hispanic White	A member of an unmarried couple
293282	4	0.02	-1.356	-1	0.901	1.653	-0.545
293284	5	-2.122	-1.663	-0.612	1	0.949	-1.619	42	Female	Some college	MA	Somewhat knowledgeable	$40.000 - $49.999	Non-Hispanic White	A member of an unmarried couple
293300	7	0.388	0.381	-0.122	-1.051	0	1.337	32	Male	Bachelor’s degree
293326	5	0.878	1.337	-0.612	-3	-3.051	-0.619	25	Male	Some college	texaS	Somewhat knowledgeable	$10.000 - $19.999	Non-Hispanic White	Never been married
293328	7	-0.612	-0.619	-1.122	-1.051	0	0.337	76	Male	Master’s degree		Moderately knowledgeable	$100.000 or more	Non-Hispanic White	Married
293350	1	-0.051	-0.612	-1	-0.663	0.381	-1.122	70	Female	High school diploma or equivalent	MN	Not very knowledgeable	$50.000 - $59.999	Non-Hispanic White	Married
293352	2	0	-0.545	-1.98	-1.347	-0.099	-1.356	36	Male	Some college	oregon	Not very knowledgeable	$40.000 - $49.999	Non-Hispanic White	Married
293360	4	0.02	-0.356	1	-0.099	0.653	1.455	48	Female	Some college	Michigan	Somewhat knowledgeable	$60.000 - $69.999	Non-Hispanic White	Married
293374	6	-0.356	-1.347	-2.545	-1.98	-1	-1.099	52	Female	Master’s degree	TX	Moderately knowledgeable	$80.000 - $89.999	Non-Hispanic White	Married
293384	7	-2.612	-0.619	-1.122	-2.051	-1	1.337	34	Female	Bachelor’s degree	Florida	Somewhat knowledgeable	$40.000 - $49.999	Non-Hispanic White	Married
293389	8	2.455	-2.099	-2.356	0	-2.98	0.653	42	Male	Bachelor’s degree	alabama	Moderately knowledgeable	$50.000 - $59.999	Non-Hispanic White	Never been married
293416	4	-2.98	-0.356	-3	-1.099	-1.347	-0.545	65	Female	Some college	California	Somewhat knowledgeable	$60.000 - $69.999	Non-Hispanic White	Married
293417	3	-2	-0.122	0.949	-1.619	-0.663	-2.612	54	Female	Some college	oregon	Moderately knowledgeable	$50.000 - $59.999	Non-Hispanic White	Divorced
293419	6	-2.356	-0.347	-0.545	-1.98	0	1.901	32	Female	Bachelor’s degree	California	Not very knowledgeable	$100.000 or more	Black or African American	Married
293420	2	-3	-2.545	-2.98	1.653	-2.099	-0.356	59	Male	Bachelor’s degree	minnesota	Somewhat knowledgeable	$30.000 - $39.999	Non-Hispanic White	Divorced	293420
293423	1	-0.051	1.388	0	1.337	0.381	-1.122	61	Male	Bachelor’s degree	nc	Moderately knowledgeable	$80.000 - $89.999	Non-Hispanic White	Married
293426	2	-2	-2.545	-0.98	-2.347	-2.099	0.644	70	Female	Some college	oregon	Moderately knowledgeable	$40.000 - $49.999	Non-Hispanic White	Widowed
293451	5	-1.122	-0.663	2.388	-1	-1.051	-1.619	50	Male	Some college	nj	Somewhat knowledgeable	$20.000 - $29.999	Non-Hispanic White	Married
293454	6	-2.356	2.653	0.455	-2.98	-1	-0.099	25	Male	Some college	Mississippi	Somewhat knowledgeable	$30.000 - $39.999	Non-Hispanic White	Married
293458	7	-0.612	-1.619	0.878	-1.051	-1	-1.663	54	Female	Bachelor’s degree	michigan	Somewhat knowledgeable	$40.000 - $49.999	Black or African American	A member of an unmarried couple
293490	8	-1.545	-1.099	-1.356	0	0.02	0.653	61	Male	Bachelor’s degree	arizona	Somewhat knowledgeable	$100.000 or more	Black or African American	Married
293536	5	-2.122	-1.663	-2.612	-3	-2.051	-1.619	55	Male	Bachelor’s degree	Delaware	Moderately knowledgeable	Less than $10.000	Non-Hispanic White	Never been married
293547	3	0	0.878	0.949	1.381	-1.663	0.388	51	Male	Some college	NY	Not very knowledgeable	$50.000 - $59.999	Black or African American	Married
293548	4	0.02	-1.356	-3	-2.099	-1.347	-0.545	41	Female	High school diploma or equivalent	Tennessee	Somewhat knowledgeable	$60.000 - $69.999	Non-Hispanic White	Divorced
293550	2	0	0.455	0.02	0.653	0.901	0.644	41	Female	Bachelor’s degree	california	Not very knowledgeable	$10.000 - $19.999	Non-Hispanic White	Never been married	293550
293552	1	-0.051	-1.612	-1	-0.663	-1.619	-0.122	28	Male	Bachelor’s degree	MS	Somewhat knowledgeable	$80.000 - $89.999	Non-Hispanic White	Never been married
293555	8	-0.545	-0.099	0.644	-2	0.02	-1.347	41	Male	Bachelor’s degree	Oklahoma	Somewhat knowledgeable		Non-Hispanic White	Never been married
293572	1	0.949	-1.612	-2	1.337	-0.619	-1.122	52	Male	Some college	mich	Somewhat knowledgeable	$20.000 - $29.999	Black or African American	Never been married
293604	5	-1.122	0.337	-0.612	-1	1.949	-0.619	33	Male	Master’s degree	Idaho	Somewhat knowledgeable	$50.000 - $59.999	Non-Hispanic White	Married
293637	8	0.455	0.901	-0.356	0	1.02	0.653	50	Female	Some college	Alabama	Somewhat knowledgeable	$50.000 - $59.999	Non-Hispanic White	Divorced
293793	6	-1.356	-2.347	-1.545	-2.98	0	0.901	44	Female	Some college	Florida	Somewhat knowledgeable	$60.000 - $69.999	Non-Hispanic White	Married
293795	8	0.455	-2.099	-3.356	-1	0.02	-1.347	51	Female	Some college	Texas	Not very knowledgeable	$20.000 - $29.999	Non-Hispanic White	Separated
293799	2	0	2.455	1.02	-1.347	1.901	0.644	66	Female	Some college	CA	Somewhat knowledgeable	$100.000 or more	Non-Hispanic White	Married
293802	3	0	-1.122	-2.051	-2.619	0.337	-0.612	53	Female	Some college	Ohio	Not very knowledgeable	$50.000 - $59.999	Black or African American	A member of an unmarried couple
293803	1	-3.051	-2.612	-3	-1.663	-0.619	-0.122	76	Male	Bachelor’s degree	california	Somewhat knowledgeable	$20.000 - $29.999	Non-Hispanic White	Married
293804	4	0.02	-3.356	0	0.901	0.653	-1.545	35	Male	Some college	Colorado	Somewhat knowledgeable	$70.000 - $79.999	Non-Hispanic White	Married
293805	3	0	-1.122	-1.051	-2.619	-0.663	2.388	47	Male	Some college	new york	Not very knowledgeable	$60.000 - $69.999	Hispanic or Latino	Married
293807	5	0.878	-1.663	-2.612	-3	-0.051	-0.619	38	Male	Some graduate school	California	Moderately knowledgeable	$70.000 - $79.999	Black or African American	Married
293810	4	1.02	-1.356	-1	-1.099	-1.347	0.455	73	Male	Some college	Michigan	Somewhat knowledgeable	$10.000 - $19.999	Non-Hispanic White	Married
293829	7	-2.612	-1.619	1.878	0.949	2	-1.663	49	Female	Some graduate school	nc	Not very knowledgeable	$30.000 - $39.999	Black or African American	Divorced
293833	6	-1.356	-0.347	-0.545	-1.98	1	0.901	40	Male	Some college	Ohio	Moderately knowledgeable	$50.000 - $59.999	Non-Hispanic White	Married
293835	2	0	-0.545	-1.98	-1.347	0.901	-2.356	48	Male	Bachelor’s degree	Michigan	Moderately knowledgeable	$60.000 - $69.999	Non-Hispanic White	Married	293835
293839	2	-1	-0.545	-0.98	-0.347	-1.099	-0.356	67	Male	Some college	Washington	Somewhat knowledgeable	$60.000 - $69.999	Hispanic or Latino	Married
293842	3	2	-0.122	1.949	-1.619	-1.663	-2.612	68	Male	Some college	California	Not very knowledgeable	$40.000 - $49.999	Non-Hispanic White	Married
293847	4	2.02	0.644	-1	-2.099	-1.347	2.455	67	Female	Bachelor’s degree	New York	Not very knowledgeable	$20.000 - $29.999	Non-Hispanic White	Widowed
293853	5	-2.122	2.337	-2.612	-3	-3.051	1.381	36	Female	Some college	kentucky	Not very knowledgeable	$30.000 - $39.999	Black or African American	Never been married
293855	6	-0.356	-0.347	-1.545	0.02	-1	-0.099	49	Female	Bachelor’s degree	Colorado	Somewhat knowledgeable	$100.000 or more	Non-Hispanic White	Married
293888	5	-0.122	-0.663	-0.612	0	-0.051	-0.619	51	Female	Some college	Texas	Somewhat knowledgeable	$30.000 - $39.999	Non-Hispanic White	Married
293893	7	-0.612	-0.619	0.878	-1.051	0	3.337	49	Female	Some high school	missouri	Not very knowledgeable	$60.000 - $69.999	Non-Hispanic White	Married
293903	3	-3	-3.122	-3.051	0.381	-1.663	2.388	33	Female	Bachelor’s degree	California	Not very knowledgeable	$60.000 - $69.999	Non-Hispanic White	Married
293908	4	0.02	0.644	-2	0.901	0.653	0.455	45	Female	Some college	CA	Not very knowledgeable	$100.000 or more	Hispanic or Latino	Married
293911	2	-3	-0.545	2.02	-2.347	2.901	1.644	45	Female	Bachelor’s degree	California	Not very knowledgeable	$100.000 or more	Hispanic or Latino	Married	293911
293921	2	1	-1.545	-1.98	-2.347	0.901	-1.356	73	Female	Some high school	TN	Not very knowledgeable	$40.000 - $49.999	Non-Hispanic White	Married
293925	3	-1	-2.122	-3.051	-2.619	2.337	1.388	69	Male	Bachelor’s degree	florida	Somewhat knowledgeable	$70.000 - $79.999	Non-Hispanic White	Married
293929	4	0.02	-2.356	-2	-1.099	0.653	-1.545	61	Female	Some college	FL	Somewhat knowledgeable	$20.000 - $29.999	Non-Hispanic White	Married
293930	5	-0.122	0.337	-1.612	0	0.949	-0.619	75	Male	Some college	IL	Somewhat knowledgeable	$60.000 - $69.999	Non-Hispanic White	Married
293933	6	0.644	1.653	1.455	-1.98	-3	2.901	70		Master’s degree	SOUTH CAROLINA	Moderately knowledgeable	$60.000 - $69.999	Black or African American	Married
293974	5	-1.122	0.337	-0.612	-1	-1.051	0.381	49	Female	High school diploma or equivalent	mi	Somewhat knowledgeable	$30.000 - $39.999	Non-Hispanic White	Married
293980	7	-0.612	-1.619	-2.122	-1.051	1	2.337	49	Male	High school diploma or equivalent	California	Not very knowledgeable	$70.000 - $79.999	Hispanic or Latino	Married
294006	1	0.949	1.388	-3	0.337	-0.619	-0.122	31	Male	Some graduate school	Utah	Moderately knowledgeable	$40.000 - $49.999	Non-Hispanic White	Married
294007	2	0	-0.545	-2.98	0.653	0.901	-0.356	66	Female	Master’s degree	MD	Moderately knowledgeable	$100.000 or more	Hispanic or Latino	Married
294022	6	-2.356	-0.347	-0.545	-1.98	0	0.901	40	Female	Some college	Illinois	Not very knowledgeable	$50.000 - $59.999	Black or African American	A member of an unmarried couple
294084	5	-3.122	-1.663	-1.612	-1	-0.051	-1.619	39	Female	Some college	alabama	Not very knowledgeable	$40.000 - $49.999	Non-Hispanic White	Married
294166	6	-0.356	1.653	1.455	0.02	0	-0.099	43	Male	Bachelor’s degree	mo	Somewhat knowledgeable	Less than $10.000	Non-Hispanic White	Never been married
294248	8	2.455	-2.099	-1.356	-3	0.02	-0.347	68	Female	High school diploma or equivalent	Indiana	Not very knowledgeable	$20.000 - $29.999	Non-Hispanic White	Divorced
294406	1	-1.051	-1.612	-2	0.337	-0.619	-1.122	39	Male	Doctoral degree	pa	Somewhat knowledgeable	$90.000 - $99.999	Black or African American	Never been married
294501	4	-1.98	-0.356	0	0.901	-0.347	-1.545	29	Male	Some college	ohio	Not very knowledgeable	$20.000 - $29.999	Non-Hispanic White	Never been married
294720	5	-1.122	-1.663	-0.612	-2	-0.051	-0.619	25	Female	Bachelor’s degree	California	Somewhat knowledgeable	$20.000 - $29.999	Non-Hispanic White	Never been married
294748	7	-0.612	-1.619	-2.122	-2.051	-1	-0.663	23	Male	High school diploma or equivalent	MN	Not very knowledgeable	$50.000 - $59.999	Non-Hispanic White	Never been married
294839	8	-0.545	-0.099	-0.356	-1	-0.98	0.653	49	Male	Master’s degree	Massachusetts	Somewhat knowledgeable	$100.000 or more	Black or African American	A member of an unmarried couple
295573	5	-2.122	-1.663	0.388	-3	-3.051	2.381	49	Male	High school diploma or equivalent	Fl.	Moderately knowledgeable	$20.000 - $29.999	Hispanic or Latino	Divorced
295593	3	0	-2.122	-2.051	-0.619	-1.663	-1.612	57	Female	Some college	arizona	Somewhat knowledgeable	$50.000 - $59.999	Hispanic or Latino	Divorced
